# Supplementary material for: Snapshots of key intermediates unveiling the growth from silver ions to Ag70 nanoclusters
Source: Royal Society of Chemistry journal article supplement (doi:10.1039/d2sc04204e), 2022-01-01
Supplement: d2sc04204e1.pdf [file d2sc04204e1.pdf]

# Supporting Information

## **Snapshots of key intermediates unveiling the growth from silver ions to Ag<sub>70</sub> nanoclusters**

Xi-Ming Luo,<sup>a</sup> Shuo Huang,<sup>a</sup> Peng Luo,<sup>b</sup> Kai Ma,<sup>a</sup> Zhao-Yang Wang,<sup>a</sup> Xi-Yan Dong,<sup>a, b</sup> and Shuang-Quan Zang <sup>\*a</sup>

*<sup>a</sup>Henan Key Laboratory of Crystalline Molecular Functional Materials, Henan International Joint Laboratory of Tumor Theranostical Cluster Materials, Green Catalysis Center, and College of Chemistry, Zhengzhou University, Zhengzhou 450001, China.*

*<sup>b</sup>College of Chemistry and Chemical Engineering, Henan Polytechnic University, Jiaozuo 454003, China*

## **Table of Contents**

### **Experimental Procedures**

Section S1. Materials and Methods .....3

Section S2. Synthesis .....4

### **Results and Discussion**

Section S3. Supplementary Figures .....5

Section S4. Supplementary Tables .....28

**References** .....34

## Experimental Procedures

### Section S1. Materials and Methods

#### 1.1 Materials and reagents.

The raw materials were purchased from Aladdin and used without further purification. All syntheses were carried out in 15 mL Teflon-lined reaction vessel under autogenous pressure.

#### 1.2 X-ray crystallography.

SCXRD measurements were performed using a Rigaku XtaLAB Pro diffractometer with Cu-K $\alpha$  radiation ( $\lambda = 1.54184$  Å) for **Ag**<sub>14</sub> and **Ag**<sub>24</sub>-**C**<sub>2</sub>**F**<sub>5</sub>, as well as Mo-K $\alpha$  radiation ( $\lambda = 0.71073$  Å) for **Ag**<sub>24</sub>. Data collection and reduction were performed using *CrysAlis<sup>Pro</sup>*. The structures were solved using intrinsic phasing methods (SHELXT-2015)<sup>1</sup> and refined by full-matrix least squares on  $F^2$  using OLEX2,<sup>2</sup> which utilizes the SHELXL-2018/3 module.<sup>3</sup>

All hydrogen atoms were placed in their calculated positions with idealized geometries, and they possessed fixed isotropic displacement parameters. Appropriate restraints and/or constraints were applied to the geometry, and the atomic displacement parameters of the atoms in the cluster were determined. All non-H atoms were located in the electron density and refined with anisotropic thermal parameters. Due to disorder of the CF<sub>3</sub>COO<sup>-</sup>, FLAT restraints were applied to keep the planarity of F atoms; SADI and DFIX were applied to keep the distances of C-F (*ca.* 1.45 Å), C-C (*ca.* 1.53 Å) and F...F of the CF<sub>3</sub>COO<sup>-</sup> in reasonable range; SAME restraints were applied to keep similar configurations of CF<sub>3</sub>COO<sup>-</sup> ligands. Besides, DFIX restraints were applied to keep the distances of C=O (*ca.* 1.2 Å), and C-N (*ca.* 1.45 Å) of the DMF molecules in a reasonable range. ISOR, DELU and SIMU restraints were used for some atoms, especially peripheral F atoms with large thermal motion. All structures were examined using the Addsym subroutine of PLATON to ensure that no additional symmetry could be applied to the models.<sup>4</sup> A solvent mask has been used due to severe disorder of free solvent and [NH<sub>2</sub>(CH<sub>3</sub>)<sub>2</sub>]<sup>+</sup> molecules around the cluster and diffract weakly.

Detailed information with respect to the X-ray crystal data, intensity collection procedure, and refinement results for the entire cluster compounds are summarized in Tables S1–S3.

#### 1.3 Characterization.

UV–Vis absorption spectra (liquid) were recorded on a U-2000 spectrophotometer.

ESI-MS spectra were obtained on a SCIEX X500R QTOF LC/MS spectrometer.

#### 1.4 Density functional theory (DFT) and time dependent density functional theory (TD-DFT) calculation.

Density functional theory (DFT) and time-dependent density functional theory (TD-DFT) calculations were performed using Gaussian 16<sup>5</sup> software with Perdew–Burke–Ernzerhof (PBE) functional.<sup>6</sup> All calculations were conducted using the Def2SVP basis set for H, C, O, N, F, S and Ag atoms.<sup>7</sup> The single crystal structure was chosen as an initial guess for ground-state optimization, and all reported stationary points were verified as true minima by the absence of negative eigenvalues in the vibrational frequency analysis. The calculated absorption spectra were obtained using Multiwfn 3.7 (dev).<sup>8</sup>

## Section S2. Synthesis

### Synthesis of $\text{Ag}_{24}(\text{Ag}_{24}\text{S}(\text{S}^i\text{Pr})_8(\text{CF}_3\text{COO})_{10}(\text{DMF})_8 \cdot 2(\text{NH}_2(\text{CH}_3)_2\text{CF}_3\text{COO}))$

$\{\text{Ag}(\text{S}^i\text{Pr})\}_n$  (0.05 mmol, 9 mg) and  $\text{CF}_3\text{COOAg}$  (0.10 mmol, 22.1 mg) were dissolved together in a mixed solvent of *i*PrOH and DMF (4.0 mL, *v:v* = 3:1), and then, 50  $\mu\text{L}$  of  $\text{CF}_3\text{COOH}$  was added to the above solution. The mixture was sealed in a 15-mL Teflon-lined reaction vessel and kept at 80°C for 3 h. After cooling to room temperature, the yellow solution was filtered and evaporated in the dark for 1 week. Yellow block crystals of  $\text{Ag}_{24}$  were isolated and washed with dichloride/*n*-hexane at a yield of 20% (based on  $\{\text{Ag}(\text{S}^i\text{Pr})\}_n$ ). Elemental analysis (found (calcd), %; based on  $\text{C}_{68}\text{H}_{112}\text{Ag}_{24}\text{F}_{30}\text{N}_8\text{O}_{28}\text{S}_9$ ): C, 17.46 (17.37); H, 2.39 (2.45); N, 2.72 (2.66); S, 5.31 (5.49).

### Synthesis of $\text{Ag}_{24}\text{-C}_2\text{F}_5(\text{Ag}_{24}\text{S}(\text{S}^i\text{Pr})_8(\text{C}_2\text{F}_5\text{COO})_{10}(\text{DMF})_8 \cdot 2(\text{NH}_2(\text{CH}_3)_2\text{CF}_3\text{COO}))$

$\{\text{Ag}(\text{S}^i\text{Pr})\}_n$  (0.05 mmol, 9 mg) and  $\text{C}_2\text{F}_5\text{COOAg}$  (0.10 mmol, 27 mg) were dissolved together in a mixed solvent of *i*PrOH and DMF (4.0 mL, *v:v* = 3:1), and then, 50  $\mu\text{L}$  of  $\text{C}_2\text{F}_5\text{COOH}$  was added to the above solution. The mixture was sealed in a 15-mL Teflon-lined reaction vessel and kept at 80°C for 3 h. After cooling to room temperature, the yellow solution was filtered and evaporated in the dark for 1 week. Yellow block crystals of  $\text{Ag}_{24}\text{-C}_2\text{F}_5$  were isolated and washed with dichloride/*n*-hexane at a yield of 25% (based on  $\{\text{Ag}(\text{S}^i\text{Pr})\}_n$ ). Elemental analysis (found (calcd), %; based on  $\text{C}_{79}\text{H}_{107}\text{Ag}_{24}\text{F}_{60}\text{N}_7\text{O}_{29}\text{S}_9$ ): C, 17.86 (18.05); H, 1.92 (2.20); N, 2.26 (2.39); S, 4.75 (4.93).

### 2.1. Different reaction time

$\{\text{Ag}(\text{S}^i\text{Pr})\}_n$  (0.05 mmol, 9 mg) and  $\text{CF}_3\text{COOAg}$  (0.10 mmol, 22.1 mg) were dissolved together in a mixed solvent of *i*PrOH and DMF (4.0 mL, *v:v* = 3:1), and then, 50  $\mu\text{L}$  of  $\text{CF}_3\text{COOH}$  was added to the above solution. The mixture was sealed in a 15-mL Teflon-lined reaction vessel and kept at 80°C for 0–36 h (**0, 1, 2, 3, 4, 5, 6, 8, 10, 12, 15, 18, 24, and 36 h**). After cooling to room temperature, the solution was filtered and evaporated in the dark. Different crystals were obtained by evaporating the mother liquor from different reaction times at room temperature: 0 h, colorless block crystals ( $\text{Ag}_{14}$ ); 3–6 h, yellow block crystals ( $\text{Ag}_{24}$ ); 8–24 h, black octahedral crystals ( $\text{Ag}_{70} \cdot \text{Ag}_{12}$ ); 36 h, black rectangular crystals ( $\text{Ag}_{70}$ ).

The acquisition of  $\text{Ag}_{70} \cdot \text{Ag}_{12}$  as a transition product shows that when the number of  $\text{Ag}_{70}$  was relatively small, the  $\text{Ag}_{70}$  nanoclusters tend to co-crystallize with small Ag species. With most of the silver species transformed into  $\text{Ag}_{70}$ , the nanoclusters will crystallize by themselves and precipitate out.

### 2.2. Different amounts of DMF

$\{\text{Ag}(\text{S}^i\text{Pr})\}_n$  (0.05 mmol, 9 mg) and  $\text{CF}_3\text{COOAg}$  (0.10 mmol, 22.1 mg) were dissolved together in a mixed solvent of (4-x) mL *i*PrOH and x mL DMF (**x = 0, 0.2, 0.4, 0.6, 0.8, 1.0, 1.2, 1.4, 1.6, 1.8, 2.0, 3.0, and 4.0**), and then, 50  $\mu\text{L}$  of  $\text{CF}_3\text{COOH}$  was added to the above solution. The mixture was sealed in a 15-mL Teflon-lined reaction vessel and kept at 80°C for 24 h. After cooling to room temperature, the solution was filtered and evaporated in the dark. After several days of evaporation of mother liquor from different reaction conditions at room temperature, different crystals were obtained: 1.0 mL DMF (3.0 mL *i*PrOH) and 1.2 mL DMF (2.8 mL *i*PrOH), black octahedral crystals ( $\text{Ag}_{70} \cdot \text{Ag}_{12}$ ); 1.4 mL DMF (2.6 mL *i*PrOH), black octahedral crystals ( $\text{Ag}_{70} \cdot \text{Ag}_{12}$ ) and black rectangular crystals ( $\text{Ag}_{70}$ ); 1.6 mL DMF (2.4 mL *i*PrOH), black rectangular crystals ( $\text{Ag}_{70}$ ); others, no crystals.

### 2.3. Different amounts of $\text{CF}_3\text{COOH}$

$\{\text{Ag}(\text{S}^i\text{Pr})\}_n$  (0.05 mmol, 9 mg) and  $\text{CF}_3\text{COOAg}$  (0.10 mmol, 22.1 mg) were dissolved together in a mixed solvent of 3 mL *i*PrOH and 1 mL DMF, and then, a certain amount of  $\text{CF}_3\text{COOH}$  (**0, 10, 20, 30, 40, 50, 60, 70, 80, 90, 100, 125, 150, 175, 200, 250  $\mu\text{L}$** ) was added to the above solution. The mixture was sealed in a 15-mL Teflon-lined reaction vessel and kept at 80°C for 24 h. After cooling to room temperature, the solution was filtered and evaporated in the dark. After several days of evaporation of mother liquor from different reaction conditions at room temperature, different crystals were obtained: 40, 50, and 60  $\mu\text{L}$   $\text{CF}_3\text{COOH}$ , black octahedral crystals ( $\text{Ag}_{70} \cdot \text{Ag}_{12}$ ); 70  $\mu\text{L}$   $\text{CF}_3\text{COOH}$ , black octahedral crystals ( $\text{Ag}_{70} \cdot \text{Ag}_{12}$ ) and black rectangular crystals ( $\text{Ag}_{70}$ ); 80, 90, and 100  $\mu\text{L}$   $\text{CF}_3\text{COOH}$ , black rectangular crystals ( $\text{Ag}_{70}$ ); others, no crystals.

## Results and Discussion

### Section S3. Supplementary Figures

#### 3.1 Tracking the reaction process based on the colour and UV-Vis of mother liquor

A series of improved experiments (Figs. S1–S4) were used to achieve our goal:  $\{\text{Ag}(\text{S}'\text{Pr})\}_n$  (0.05 mmol, 9 mg) and  $\text{CF}_3\text{COOAg}$  (0.10 mmol, 22 mg) together with  $\text{CF}_3\text{COOH}$  (0–250  $\mu\text{L}$ ) were mixed and reacted in the 4 mL organic solvent containing DMF and  $t$ PrOH, under solvothermal conditions at 80 °C (1–36 h).

Through different reaction time (1–36 h) to control the reduction process ( $\text{CF}_3\text{COOH}$ : 50  $\mu\text{L}$ ; DMF: 1 mL;  $t$ PrOH: 3 mL), the color of the mother liquor is significantly different (Fig. 1). From colorless (0–1 h) to yellow (2–3 h), then to orange (4–6 h), red (8–10 h), and finally to black red (over 12 h), this indicates that the reduction degree of the system gradually deepened. Time-dependent UV-Vis absorption spectra (Fig. 1b and Fig. S1) show the characteristic peak (*ca.* 530 nm) of  $\text{Ag}_{70}$  appeared after 4 hours (Fig. S1d), corresponding to the change of mother liquor from yellow to orange (Fig. 1). After reaction for 24 hours, UV-Vis spectra of mother liquor were basically consistent with that of  $\text{Ag}_{70}$  (Fig. S1c). Interestingly, when the mother liquor was yellow (reaction time: 2–3 h), only a characteristic absorption sharp peak (416 nm) that did not belong to the  $\text{Ag}_{70}$  appeared in the UV-Vis spectrum (Fig. S1d), suggesting that intermediate substances may have been formed during the formation of  $\text{Ag}_{70}$ . The product of the reaction for 3 hours was filtered and evaporated at room temperature to obtain yellow crystals (Fig. 2c),  $\text{S}@_{\text{Ag}_{24}}(\text{S}'\text{Pr})_8(\text{CF}_3\text{COO})_{10}(\text{DMF})_{10}$ ,  $\text{Ag}_{24}$  in short. The characteristic absorption peak (*ca.* 420 nm) of  $\text{Ag}_{24}$  corresponds well with mother liquor (reaction time: 3 h), indicating that the main substance in the mother liquor at this time is  $\text{Ag}_{24}$  clusters. With the continuous generation of  $\text{Ag}_{24}$  in the mother liquor, multiple  $\text{Ag}_{24}$  clusters with high reactive activity generate more stable  $\text{Ag}_{70}$  through collision, self-assembly and fusion, so the characteristic peak (*ca.* 530 nm) of  $\text{Ag}_{70}$  gradually appears and rapidly increases (Fig. S1a–b).

Parallel experiments (variable: DMF (Figs. S2–S3) or  $\text{CF}_3\text{COOH}$  (Fig. S4)) also have similar phenomena, which suggest intermediate substances. The appropriate amount (*ca.* 1.0–1.6 mL) of DMF can effectively prepare  $\text{Ag}_{70}$  clusters (Fig. S2).  $\text{Ag}_{70}$  cannot be generated effectively if the DMF content in the mixed solution is too low (*ca.* 0.2–0.8 mL, Fig. S2) or too high (*ca.* 1.8–4.0 mL, Figs. S2–S3). As shown in Fig. S2b, when DMF content is low (*ca.* 0.2–0.8 mL), the characteristic peak of  $\text{Ag}_{24}$  is obvious, while  $\text{Ag}_{70}$  is weak. It may be caused by the poor efficiency of conversion from  $\text{Ag}_{24}$  to  $\text{Ag}_{70}$ . As shown in Fig. S2c and Fig. S3, when DMF content is large (*ca.* 1.8–4.0 mL), no characteristic peak was observed, possibly caused by the inability to form  $\text{Ag}_{24}$  (*ca.* 1.8–4.0 mL).

The introduction of  $\text{CF}_3\text{COOH}$  may be a necessary factor in the formation of  $\text{Ag}_{24}$  (Fig. S4). As shown in Fig. S4b,  $\text{Ag}_{24}$  cannot be formed without or with only a small amount (10  $\mu\text{L}$ ) of  $\text{CF}_3\text{COOH}$ . Meanwhile, excess acid (> 100  $\mu\text{L}$ ) also inhibits the formation of the products (Fig. S4c). Increasing the amount of  $\{\text{Ag}(\text{S}'\text{Pr})\}_n$  (0.05 mmol→0.10 mmol) in the reactants had little effect on the final result (Fig. S5).

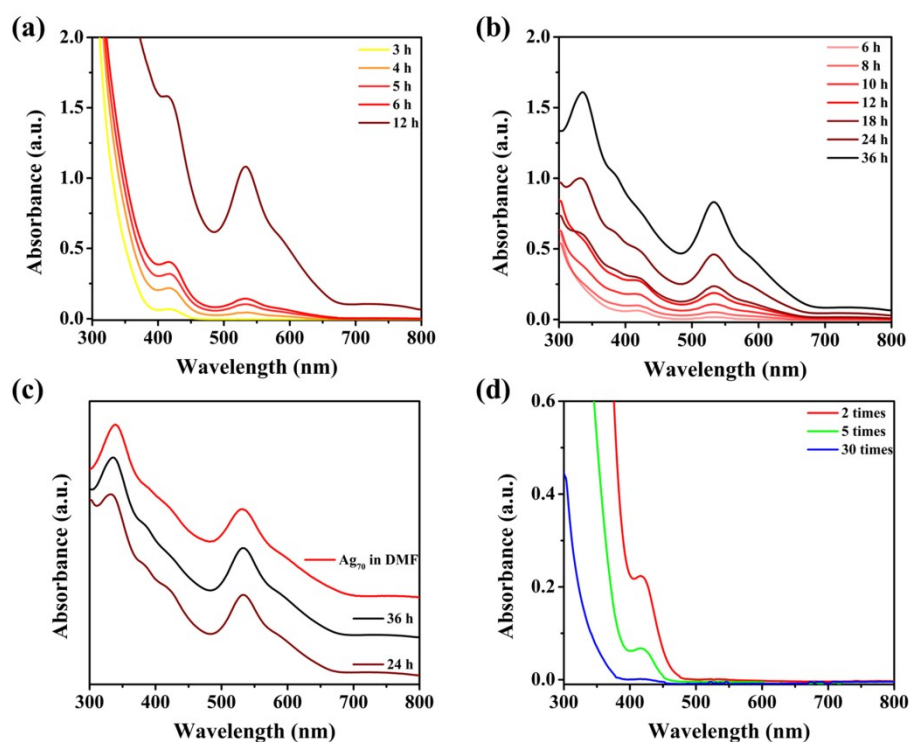

**Fig. S1** (a) UV-Vis absorption spectra of mother liquor after solvothermal reaction at different times of 3, 4, 5, 6, and 12 hours (diluted 5 times by DMF). (b) UV-Vis absorption spectra of mother liquor after solvothermal reaction at different times of 6, 8, 10, 12, 18, 24, and 36 hours (diluted 30 times by DMF). (c) Comparing the UV-Vis absorption spectra of  $Ag_{70}$ , 24 h and 36 h mother liquor. (d) UV-Vis absorption spectra of mother liquor after 3 h solvothermal reaction (diluted 2, 5, and 30 times by DMF).

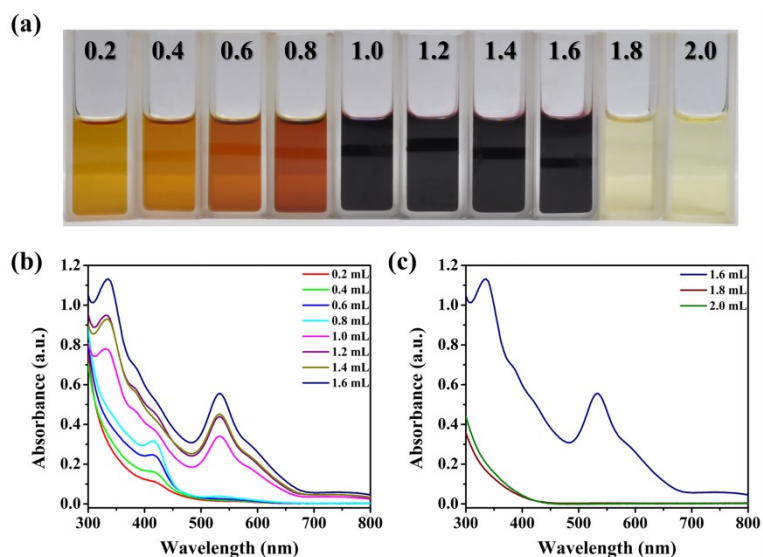

**Fig. S2** (a) The color of mother liquor after solvothermal reaction at different mixture solvents (v(DMF) + v(PrOH) = 4 mL): the volume of DMF is 0.2, 0.4, 0.6, 0.8, 1.0, 1.2, 1.4, 1.6, 1.8, and 2.0 mL, respectively (from left to right). (b-c) Time-dependent UV-Vis absorption spectra for tracking the reaction process (diluted 30 times by DMF). Specific methods are as follows: transfer 100  $\mu$ L of mother liquor to a quartz cuvette, and then put 2.9 mL DMF to dilute the sample.

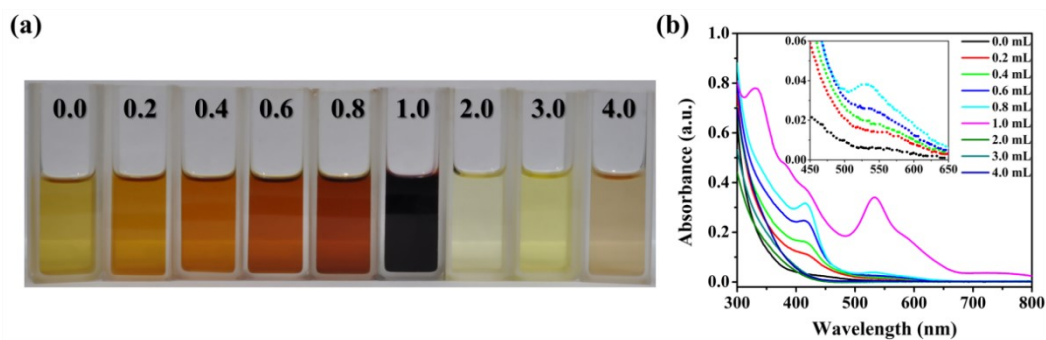

**Fig. S3** (a) The color of mother liquor after solvothermal reaction at different mixture solvents ( $v(\text{DMF}) + v(\text{PrOH}) = 4 \text{ mL}$ ): the volume of DMF is 0.0, 0.2, 0.4, 0.6, 0.8, 1.0, 2.0, 3.0, and 4.0 mL, respectively (from left to right). (b) Time-dependent UV-Vis absorption spectra for tracking the 3a reaction process (diluted 30 times by DMF).

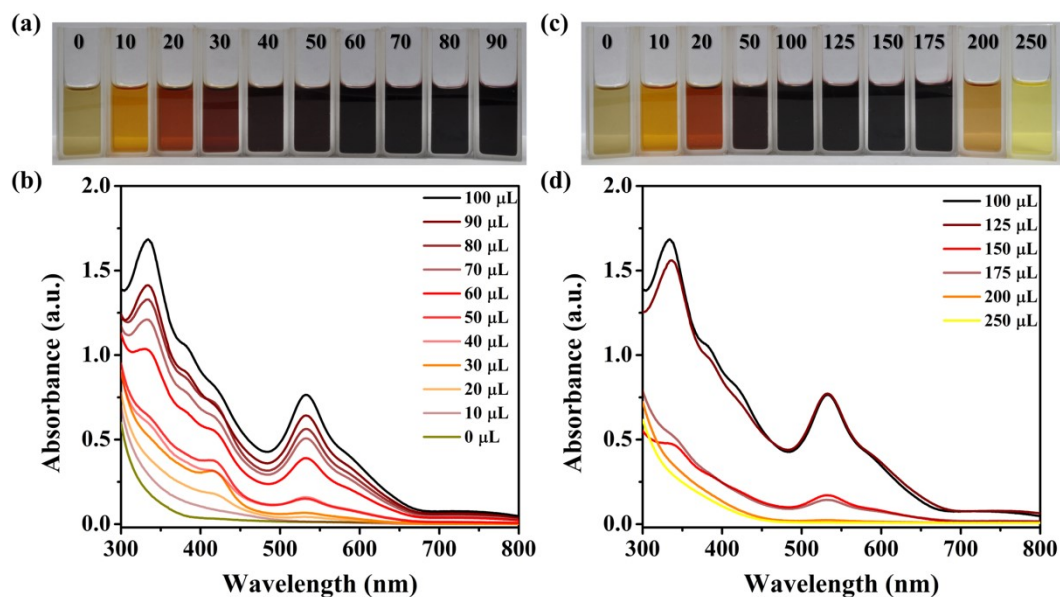

**Fig. S4** (a) The color of mother liquor after solvothermal reaction at different  $\text{CF}_3\text{COOH}$ . From left to right, the volume of  $\text{CF}_3\text{COOH}$  is 0, 10, 20, 30, 40, 50, 60, 70, 80 and 90  $\mu\text{L}$ , respectively. (b) Time-dependent UV-Vis absorption spectra for tracking the 4a reaction process (diluted 30 times by DMF). (c) The color of mother liquor after solvothermal reaction at different  $\text{CF}_3\text{COOH}$ . From left to right, the volume of  $\text{CF}_3\text{COOH}$  is 0, 10, 20, 50, 100, 125, 150, 175, 200 and 250  $\mu\text{L}$ , respectively. (d) Time-dependent UV-Vis absorption spectra for tracking the 4c reaction process (diluted 30 times by DMF).

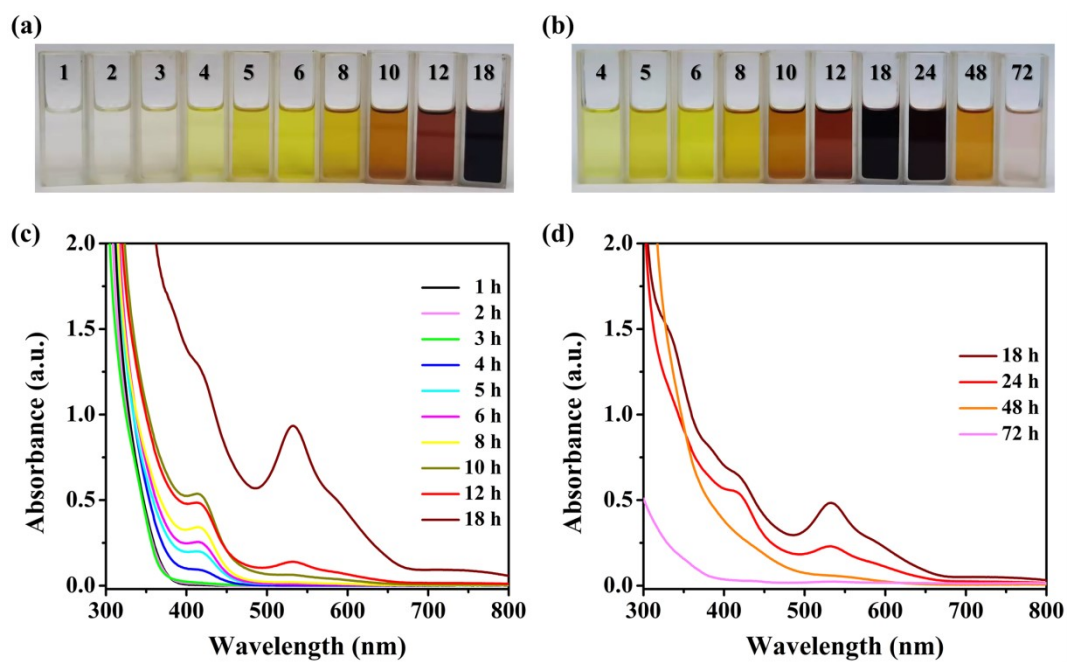

**Fig. S5** (a, b) The color of mother liquor after solvothermal reaction (13.5 mg  $\{Ag(S'Pr)_n\}$ , 22 mg  $CF_3COOAg$ , and 50  $\mu L$   $CF_3COOH$  in mixture solvent (PrOH : DMF = 3 : 1) at 80  $^{\circ}C$ ) for different times (1, 2, 3, 4, 5, 6, 8, 10, 12, 18, 24, 48, and 72 hours); (c, d) UV-Vis absorption spectra (diluted 10 times by DMF). Among them, mother liquor (18 and 24 h) in (d) was diluted 20 times for comparison.



### 3.2 Tracking the reaction process based on ESI-MS of mother liquor

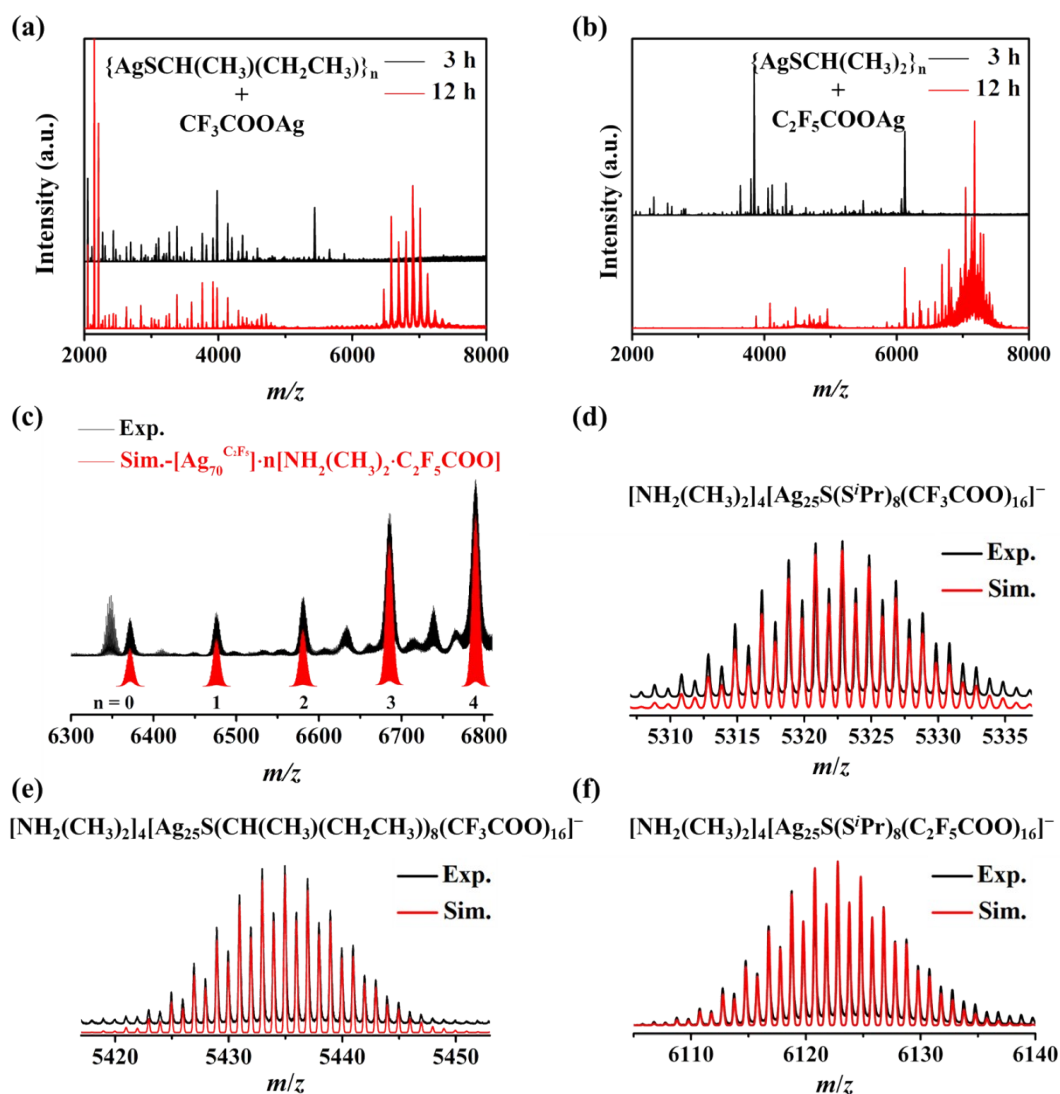

**Fig. S6** (a) Negative ion mode ESI-MS in range of  $m/z = 2000-8000$  on the reaction of 10 mg  $\{Ag(SCH(CH_3)(CH_2CH_3))_n\}$ , 22 mg  $CF_3COOAg$ , and 50  $\mu L$   $CF_3COOH$  in mixture solvent (PrOH : DMF = 3 : 1) at 3 and 12 hours at 80 °C. (b) Negative ion mode ESI-MS in range of  $m/z = 2000-8000$  on the reaction of 10 mg  $\{Ag(SCH(CH_3)_2)_n\}$ , 30 mg  $C_2F_5COOAg$ , and 70  $\mu L$   $C_2F_5COOH$  in mixture solvent (PrOH : DMF = 3 : 1) at 3 and 24 hours at 80 °C. (c) Experimental (Exp.) in 24 h (b) and simulated (Sim.) mass spectra ( $m/z = 6300-6810$ ) of the isotopic envelopes; (d-f) Experimental (Exp.) and simulated (Sim.) mass spectra of the isotopic envelopes for  $\{[NH_2(CH_3)_2]_4[Ag_{25}S(SCH(CH_3)_2)_8(CF_3COO)_{16}]^-\}$ , 4e (d);  $\{[NH_2(CH_3)_2]_4[Ag_{25}S(SCH(CH_3)(CH_2CH_3))_8(CF_3COO)_{16}]^-\}$ , 4e (e);  $\{[NH_2(CH_3)_2]_4[Ag_{25}S(SCH(CH_3)_2)_8(C_2F_5COO)_{16}]^-\}$ , 4e (f).

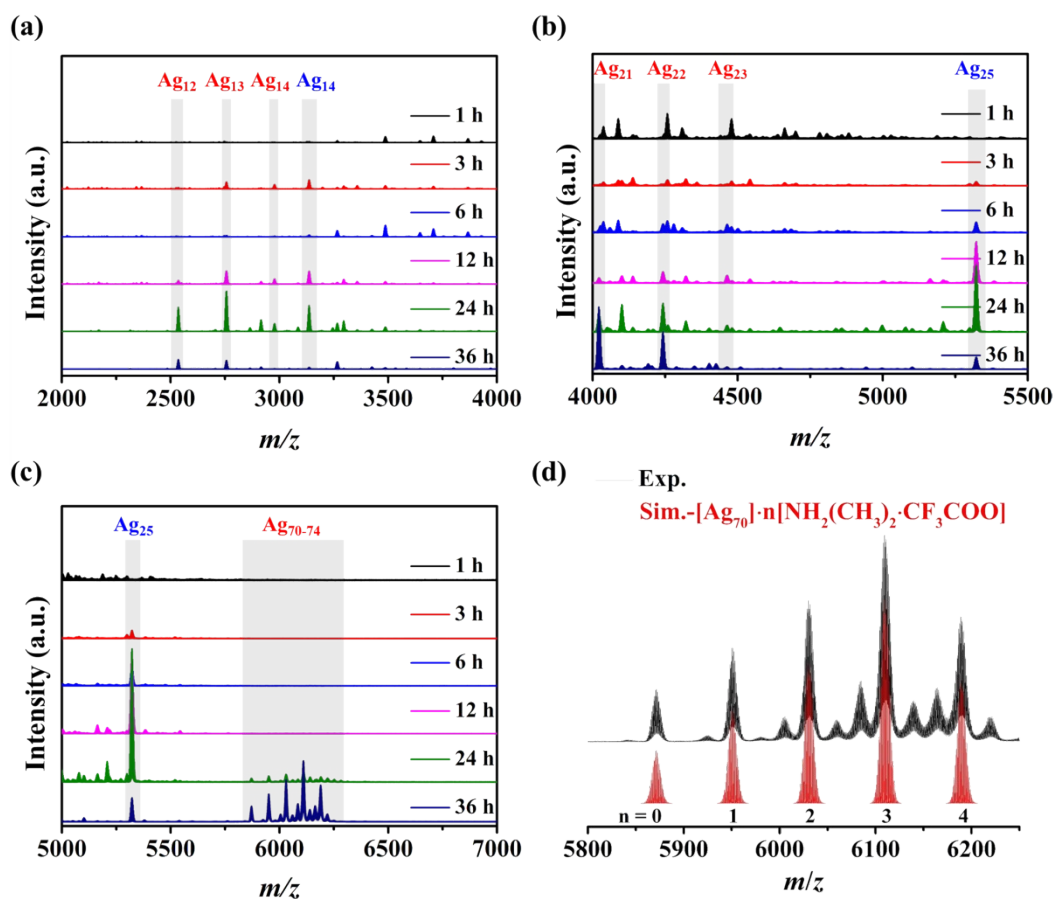

**Fig. S7** Time-dependent negative ion mode ESI-MS in range of  $m/z = 2000-7000$  on the reaction of 9 mg  $\{Ag(S^iPr)_n\}$ , 22 mg  $CF_3COOAg$ , and 50  $\mu L$   $CF_3COOH$  in mixture solvent (iPrOH : DMF = 3 : 1) at 1, 3, 6, 12, 24, and 36 hours at 80 °C: (a)  $m/z = 2000-4000$ . (b)  $m/z = 4000-5500$ . (c)  $m/z = 5000-7000$ . (d) Experimental (Exp.) in 36 h and simulated (Sim.) mass spectra ( $m/z = 5800-6250$ ) of the isotopic envelopes.

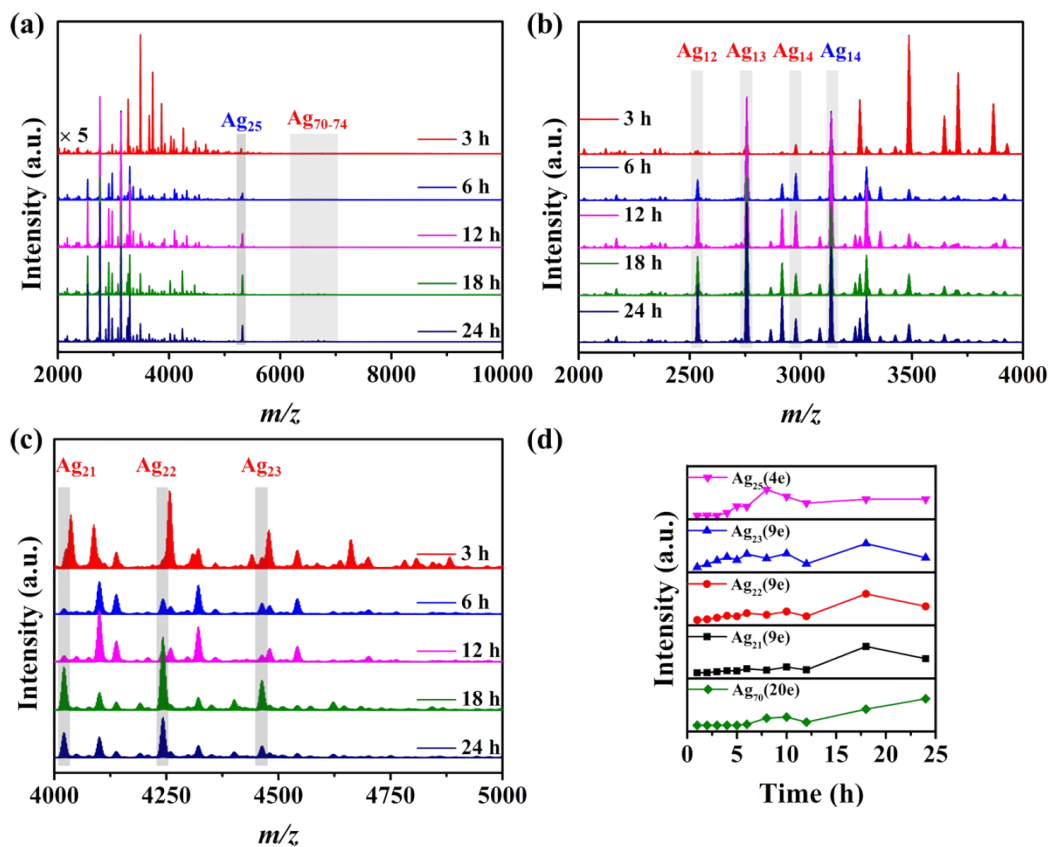

Fig. S8 Time-dependent negative ion mode ESI-MS in range of  $m/z = 2000$ – $10000$  on the reaction of 13.5 mg  $\{Ag(S'Pr)\}_n$ , 22 mg  $CF_3COOAg$ , and 50  $\mu L$   $CF_3COOH$  in mixture solvent (PrOH : DMF = 3 : 1) at 3, 6, 12, 18, and 24 hours at 80  $^\circ C$ : (a)  $m/z = 2000$ – $10000$ . (b)  $m/z = 2000$ – $4000$ . (c)  $m/z = 4000$ – $5000$ . (d) Intensity-base profiles of  $\{Ag_{25}\}$ ,  $\{Ag_{23}\}$ ,  $\{Ag_{22}\}$ ,  $\{Ag_{21}\}$ , and  $Ag_{70}$ .

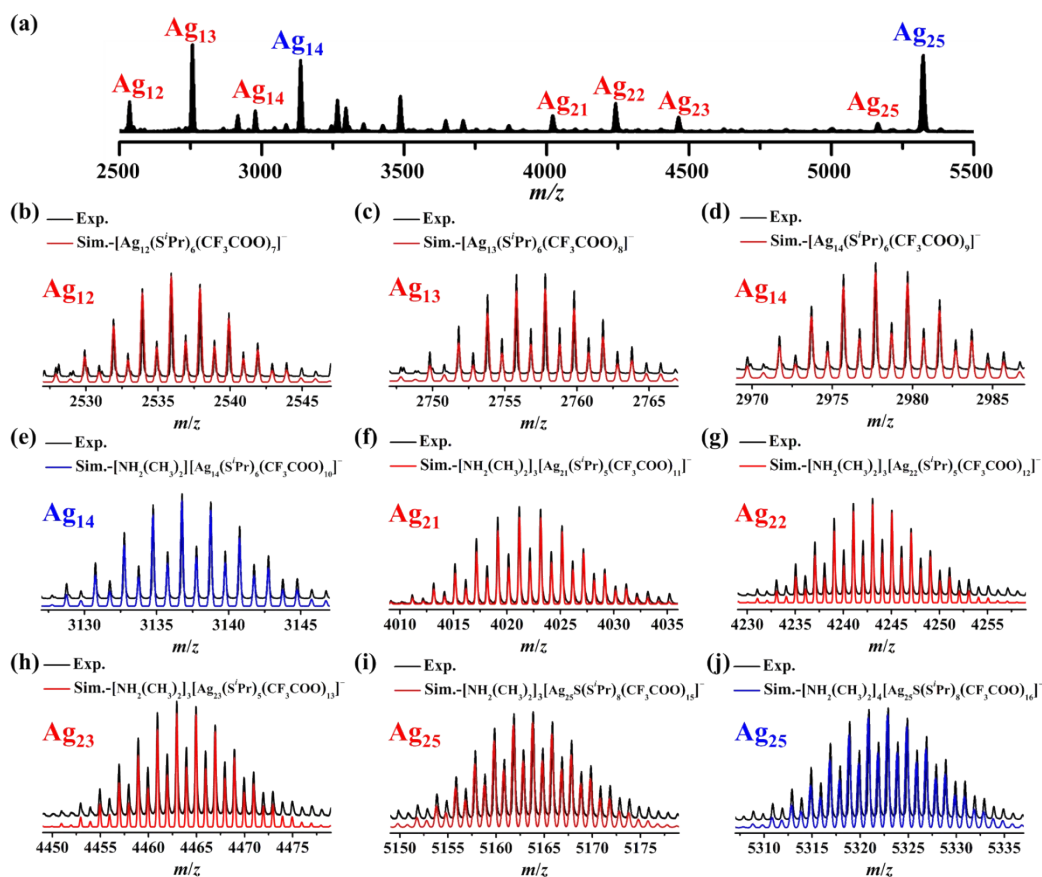

**Fig. S9** (a) Negative ion mode ESI-MS ( $m/z = 2500-5500$ ) on the reaction of 9.0 mg  $\{Ag(S'Pr)\}_n$ , 22 mg  $CF_3COOAg$ , and 50  $\mu L$   $CF_3COOH$  in mixture solvent (PrOH : DMF = 3 : 1) for 12h at 80 °C. (b-j) Experimental (Exp.) and simulated (Sim.) mass spectra of the isotopic envelopes for  $[Ag_{12}(S'Pr)_6(CF_3COO)_7]^-$ , 0e (b);  $[Ag_{13}(S'Pr)_6(CF_3COO)_8]^-$ , 0e (c);  $[Ag_{14}(S'Pr)_6(CF_3COO)_9]^-$ , 0e (d);  $[NH_2(CH_3)_2][Ag_{14}(S'Pr)_6(CF_3COO)_{10}]^-$ , 0e (e);  $\{[NH_2(CH_3)_2]_3[Ag_{21}(S'Pr)_5(CF_3COO)_{11}]^-\}$ , 9e (f);  $\{[NH_2(CH_3)_2]_3[Ag_{22}(S'Pr)_5(CF_3COO)_{12}]^-\}$ , 9e (g);  $\{[NH_2(CH_3)_2]_3[Ag_{23}(S'Pr)_5(CF_3COO)_{13}]^-\}$ , 9e (h);  $\{[NH_2(CH_3)_2]_3[Ag_{25}(S'Pr)_8(CF_3COO)_{15}]^-\}$ , 4e (i);  $\{[NH_2(CH_3)_2]_4[Ag_{25}(S'Pr)_8(CF_3COO)_{16}]^-\}$ , 4e (j).

### 3.3 Structure

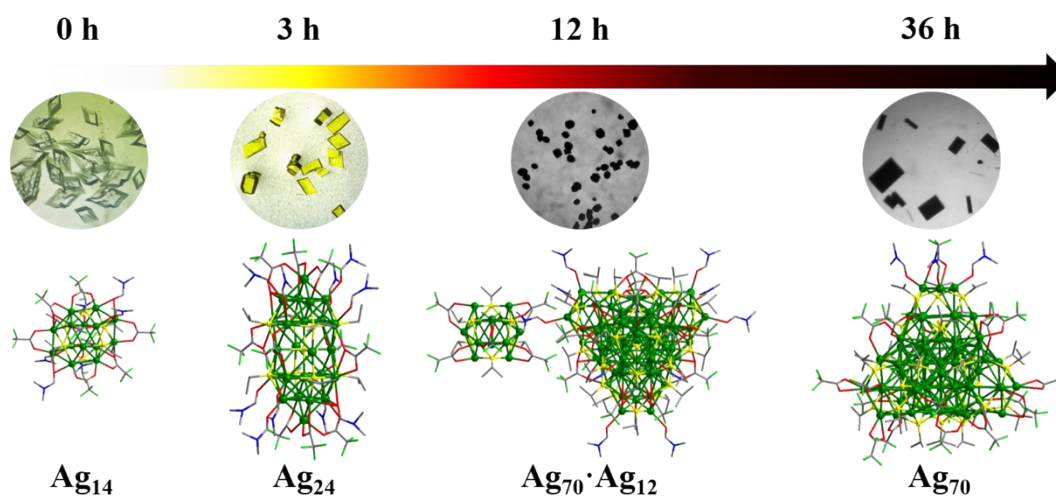

**Fig. S10** The photographic images and structures of crystals precipitated from mother liquor under solvothermal reaction at different times: 0 h, colourless crystal,  $Ag_{14}$ ; 3 h, yellow crystal,  $Ag_{24}$ ; 12 h, black octahedral crystal,  $Ag_{70} \cdot Ag_{12}$ ; 36 h, black rectangular crystal,  $Ag_{70}$ .

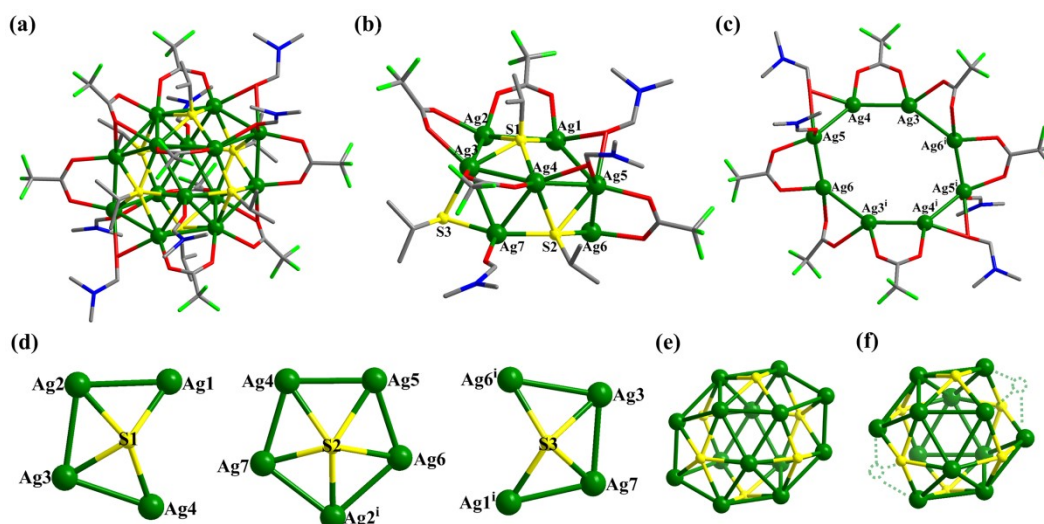

**Fig. S11** The crystal structure of **Ag<sub>14</sub>**. (a) The total structure. (b) The asymmetric unit. (c) The middle silver ring protected and stabilized by  $\text{CF}_3\text{COO}^-$  and DMF. (d) The coordination modes of three crystallographically independent S atoms from different  $\text{S}'\text{Pr}^-$  ligands. (e) The Ag-S skeleton of **Ag<sub>14</sub>**. (f) The Ag-S skeleton of the  $\text{Ag}_{12}$  of **Ag<sub>70</sub>**-**Ag<sub>12</sub>**. It can be considered that **Ag<sub>14</sub>** is missing two horns (Ag ions). Atom color codes: green, Ag; yellow, S; red, O; bright green, F; blue, N; grey, C. All hydrogen atoms are omitted for clarity. Symmetry code:  $1.5-x, 1.5-y, 1-z$ .

SCXRD result shows that **Ag<sub>14</sub>** ( $\text{Ag}_{14}(\text{S}'\text{Pr})_6(\text{CF}_3\text{COO})_8(\text{DMF})_6$ , Fig. S11a) crystallizes in monoclinic space group  $C2/c$  (No. 15) and half a cluster ( $\text{Ag}_7(\text{S}'\text{Pr})_3(\text{CF}_3\text{COO})_4(\text{DMF})_3$ ) exists in the asymmetric unit (Fig. S11b). **Ag<sub>14</sub>** is a centrosymmetric ellipsoidal cluster and contains an  $\text{Ag}_{14}\text{S}_6$  shell (Fig. S11e) protected by eight  $\text{CF}_3\text{COO}^-$  and six DMF molecules. Based on their coordination modes, six  $\text{S}'\text{Pr}^-$  ligands are divided into two types comprised of 4  $\mu_4$  ( $\text{Ag}_4$  trapezoids) and 2  $\mu_5$  ( $\text{Ag}_5$  pentagon) modes (Fig. S11d) with Ag-S bond lengths ranging from 2.462(4)–2.550(5) Å, 2.473(4)–2.682(5) Å, respectively. By sharing vertices with each other, the  $\text{Ag}_4$  trapezoids and  $\text{Ag}_5$  pentagons are linked together to form a hollow ellipsoidal  $\text{Ag}_{14}\text{S}_6$  cage, which exhibits a three-layer  $\text{Ag}_3$ - $\text{Ag}_8$ - $\text{Ag}_3$  (triangle-octagon-triangle) skeletal arrangement. The distances of  $\text{Ag}\cdots\text{Ag}$  interactions range from 2.835(3) to 3.335(3) Å (Table S2), indicating that there are significant argentophilic interactions in consolidating the **Ag<sub>14</sub>** cluster. The  $\text{Ag}_3$  triangle at both ends is covered and stabilized by one  $\text{CF}_3\text{COO}^-$  ligand (coordination mode:  $\mu_2$ - $\eta^1, \eta^1$ ) and one DMF molecule, while  $\text{Ag}_8$  octagon ring in the middle is surrounded by six  $\text{CF}_3\text{COO}^-$  ligands (coordination modes:  $\mu_2$ - $\eta^1, \eta^1$  and  $\mu_3$ - $\eta^1: \eta^2$ ) and four DMF molecules on the outside. The Ag-O( $\text{CF}_3\text{COO}^-$ ) and Ag-O(DMF) bond lengths span from 2.24(3)–2.77(3) Å, 2.28(3)–2.51(2) Å, respectively.

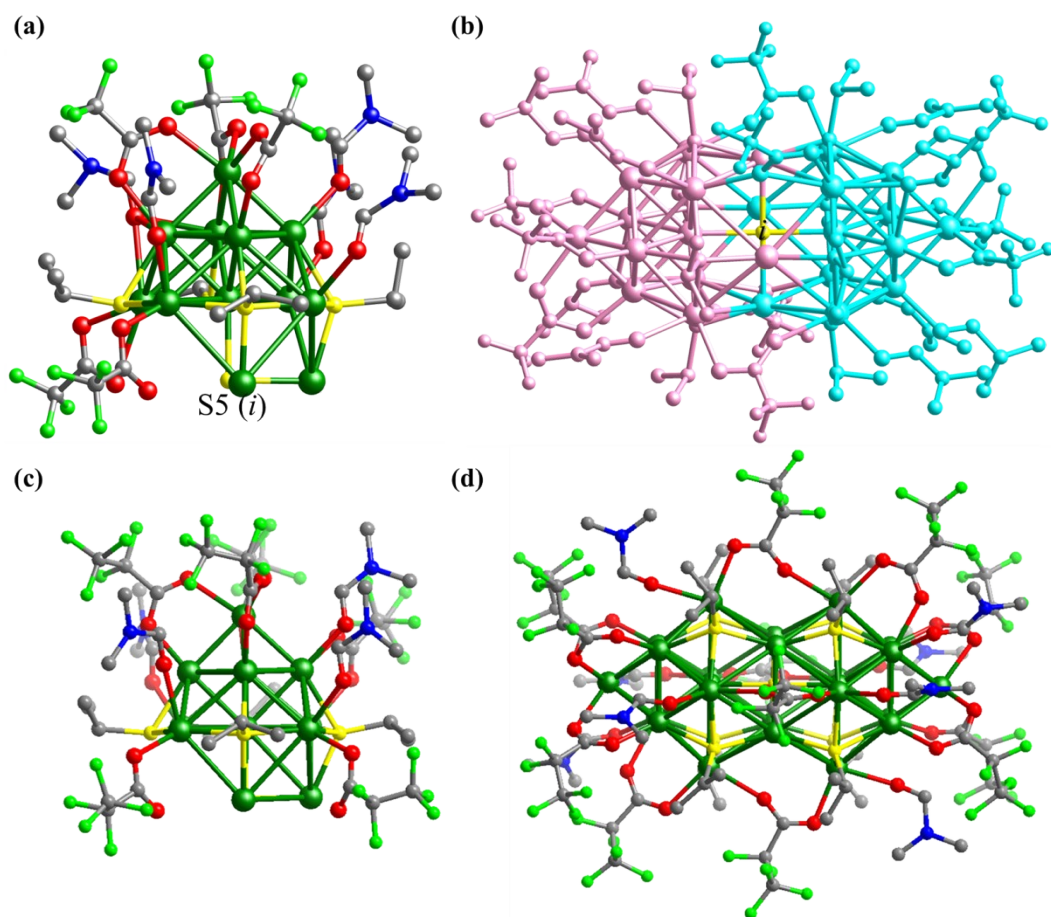

**Fig. S12** The crystal structure of  $\text{Ag}_{24}$  and  $\text{Ag}_{24}\text{-C}_2\text{F}_5$ . (a) The asymmetric unit of  $\text{Ag}_{24}$ . (b) The total structure of  $\text{Ag}_{24}$ , containing two asymmetric units sharing a S atom (S5) at the inversion center (*i*). (c) The asymmetric unit of  $\text{Ag}_{24}\text{-C}_2\text{F}_5$ . (d) The total structure of  $\text{Ag}_{24}\text{-C}_2\text{F}_5$ .

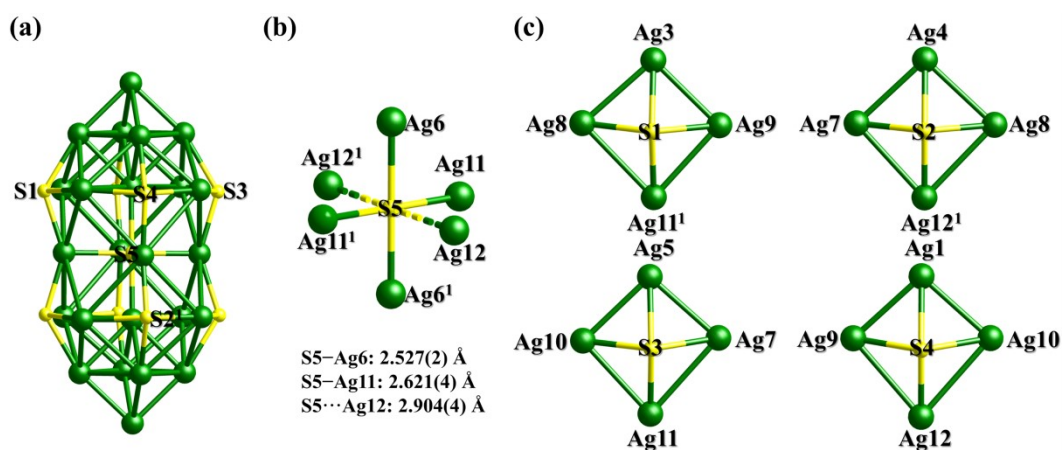

**Fig. S13** The  $\text{S@Ag}_{24}\text{S}_8$  framework of  $\text{Ag}_{24}$  and the coordination modes of five crystallographically independent S atoms (one from  $\text{S}^{2-}$ , others from  $\text{S}^{\text{Pr}^-}$  ligands).

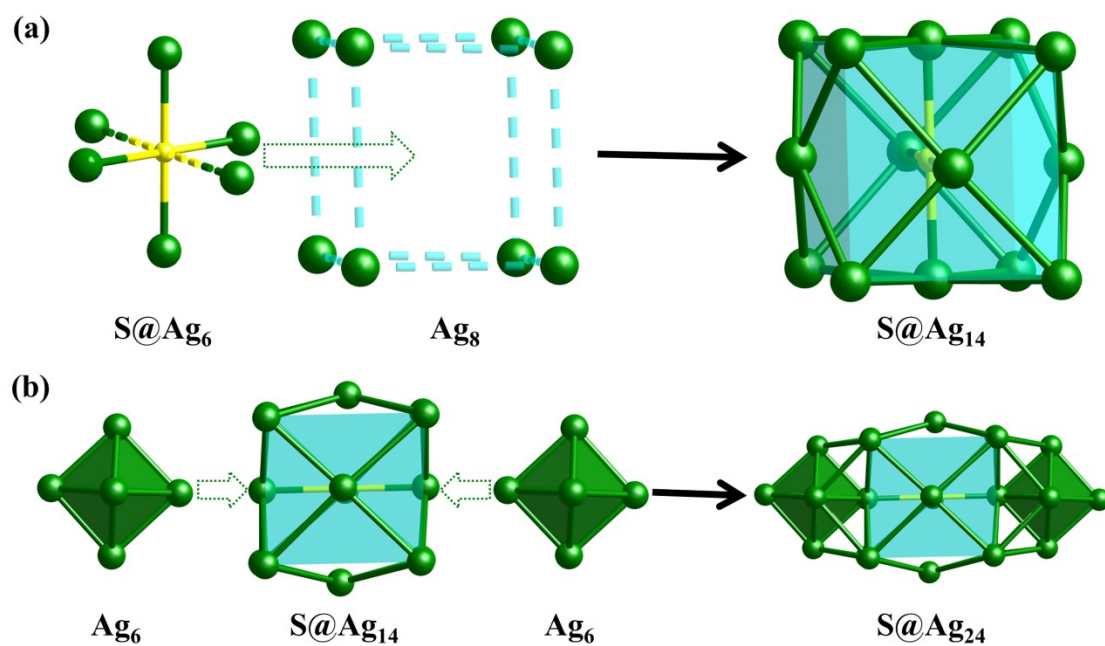

**Fig. S14** The  $S@Ag_{24}$  skeleton of  $Ag_{24}$ . (a) The  $S^{2-}$  acts as a template to induce a distorted octahedron  $S@Ag_6$ , which is confined within a slightly twisted cube  $Ag_8$ .  $S@Ag_{14}$  ( $S@Ag_6@Ag_8$ ) was viewed as the middle segment of the  $Ag_{24}$  cluster. (b) Fusion of  $S@Ag_{14}$  and two  $Ag_6$  cores into a  $S@Ag_{24}$  kernel in the  $Ag_{24}$  nanocluster.

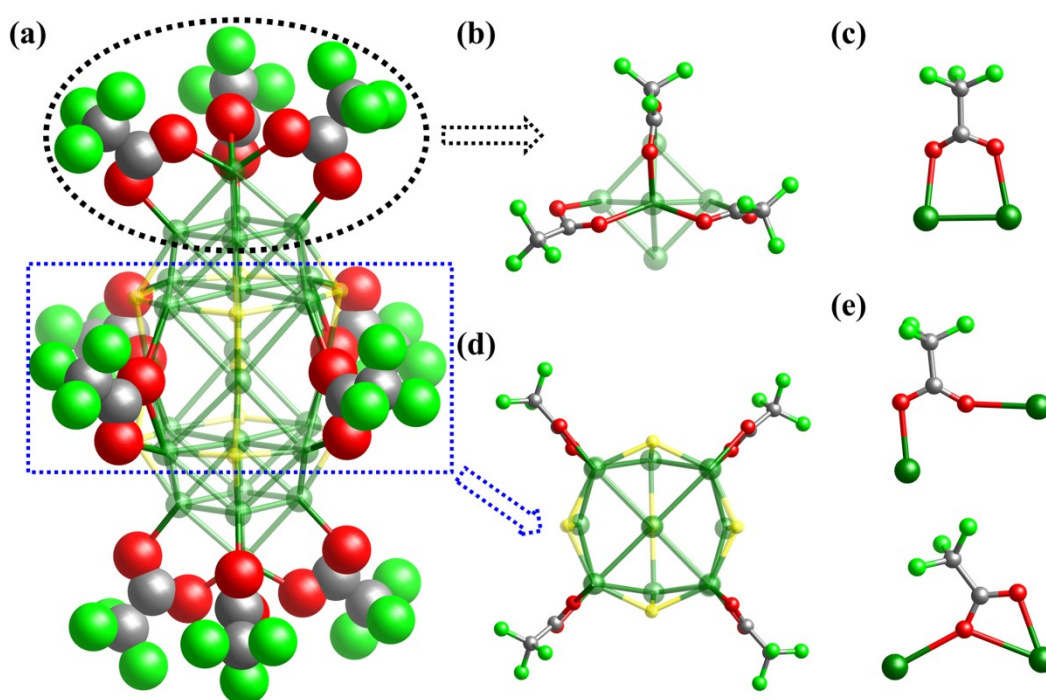

**Fig. S15** The distribution and coordination modes of ten  $CF_3COO^-$  ligands on the surface of  $Ag_{24}$ .

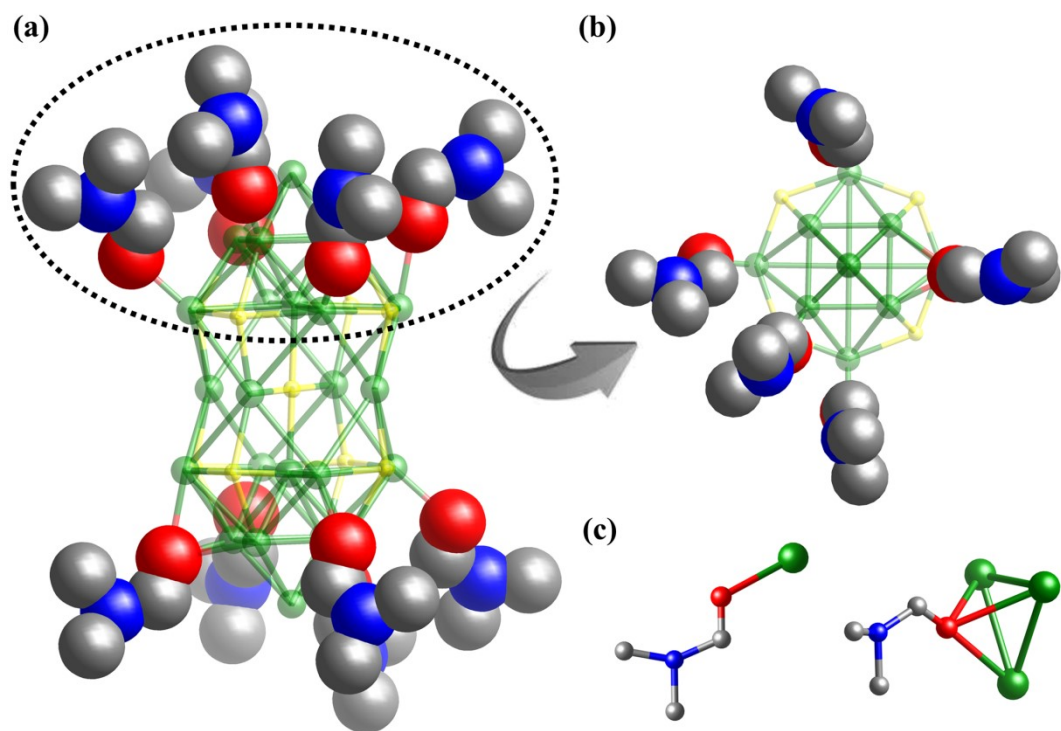

Fig. S16 The distribution and coordination modes ( $\mu_1$  and  $\mu_3$ ) of ten coordinated DMF molecules on the surface of  $\text{Ag}_{24}$ .



### 3.4 Characterization of properties of Ag<sub>24</sub>

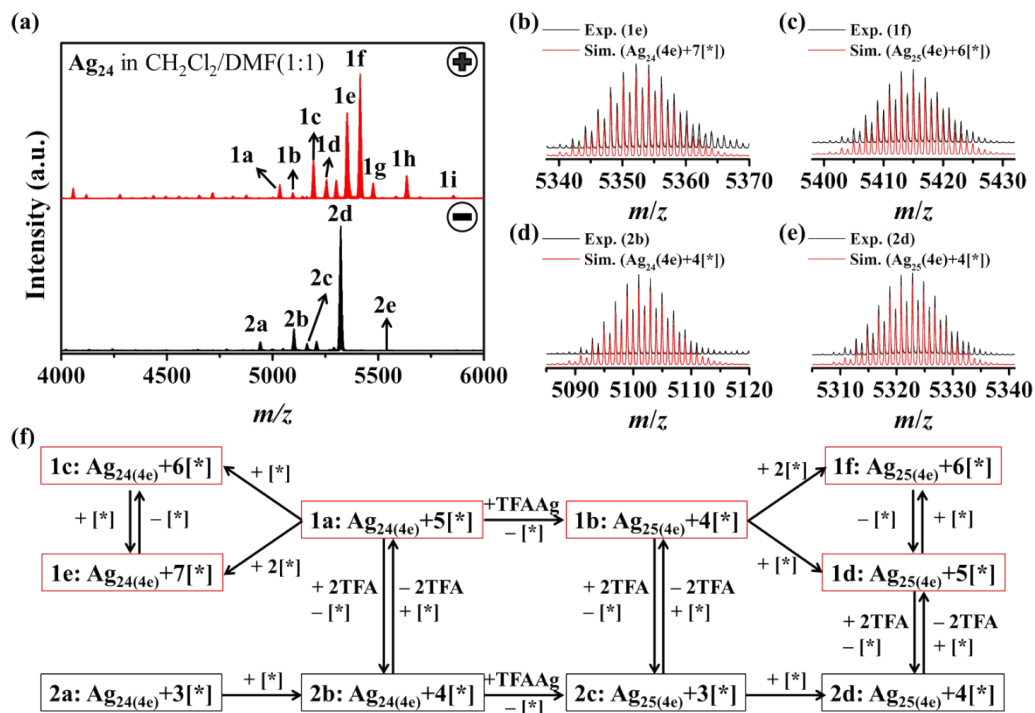

**Fig. S17** (a) The position and negative ion mode ESI-MS ( $m/z = 4000-6000$ ) of Ag<sub>24</sub> in CH<sub>2</sub>Cl<sub>2</sub>/DMF ( $v:v = 1:1$ ). (b-e) Experimental (Exp.) and simulated (Sim.) mass spectra of the main isotopic envelopes for  $\{[\text{NH}_2(\text{CH}_3)_2]_7[\text{Ag}_{24}\text{S}(\text{S}^i\text{Pr})_8(\text{CF}_3\text{COO})_{16}]\}^+$  (b);  $\{[\text{NH}_2(\text{CH}_3)_2]_6[\text{Ag}_{25}\text{S}(\text{S}^i\text{Pr})_8(\text{CF}_3\text{COO})_{16}]\}^+$  (c);  $\{[\text{NH}_2(\text{CH}_3)_2]_4[\text{Ag}_{24}\text{S}(\text{S}^i\text{Pr})_8(\text{CF}_3\text{COO})_{15}]\}^-$  (d);  $\{[\text{NH}_2(\text{CH}_3)_2]_4[\text{Ag}_{25}\text{S}(\text{S}^i\text{Pr})_8(\text{CF}_3\text{COO})_{16}]\}^-$  (e). (f) The correlations of the main envelopes of 1a-1f and 2a-2d. Note: [\*] =  $[\text{NH}_2(\text{CH}_3)_2][\text{CF}_3\text{COO}]$ , TFA<sup>-</sup> =  $\text{CF}_3\text{COO}^-$ .

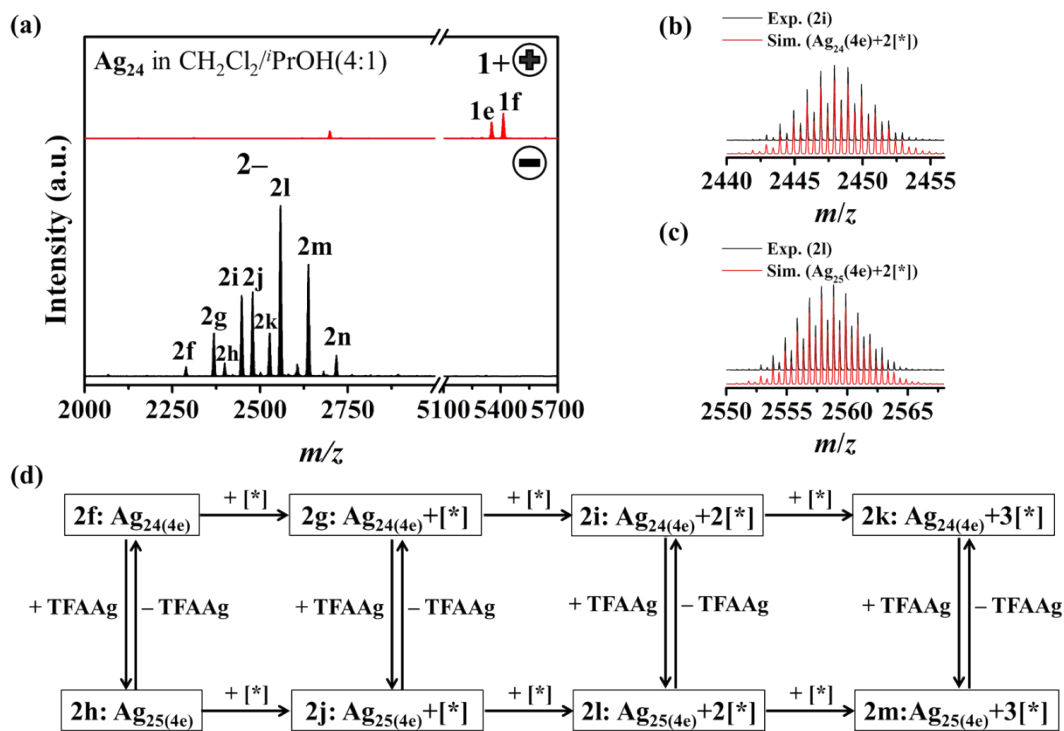

**Fig. S18** (a) The position and negative ion mode ESI-MS ( $m/z = 2000\text{--}5700$ ) of  $\text{Ag}_{24}$  in  $\text{CH}_2\text{Cl}_2/\text{PrOH}$  ( $v:v = 4:1$ ). (b–c) Experimental (Exp.) and simulated (Sim.) mass spectra of the main isotopic envelopes for  $\{[\text{NH}_2(\text{CH}_3)_2]_2[\text{Ag}_{24}\text{S}(\text{SPr})_8(\text{CF}_3\text{COO})_{14}]\}^{2-}$  (b);  $\{[\text{NH}_2(\text{CH}_3)_2]_2[\text{Ag}_{25}\text{S}(\text{SPr})_8(\text{CF}_3\text{COO})_{15}]\}^{2-}$  (c). (d) The correlations of the main envelopes of **2f–2m**. Note:  $[*] = [\text{NH}_2(\text{CH}_3)_2][\text{CF}_3\text{COO}]$ ,  $\text{TFA}^- = \text{CF}_3\text{COO}^-$ .

### 3.5 Theoretical calculation of $\text{Ag}_{24}$

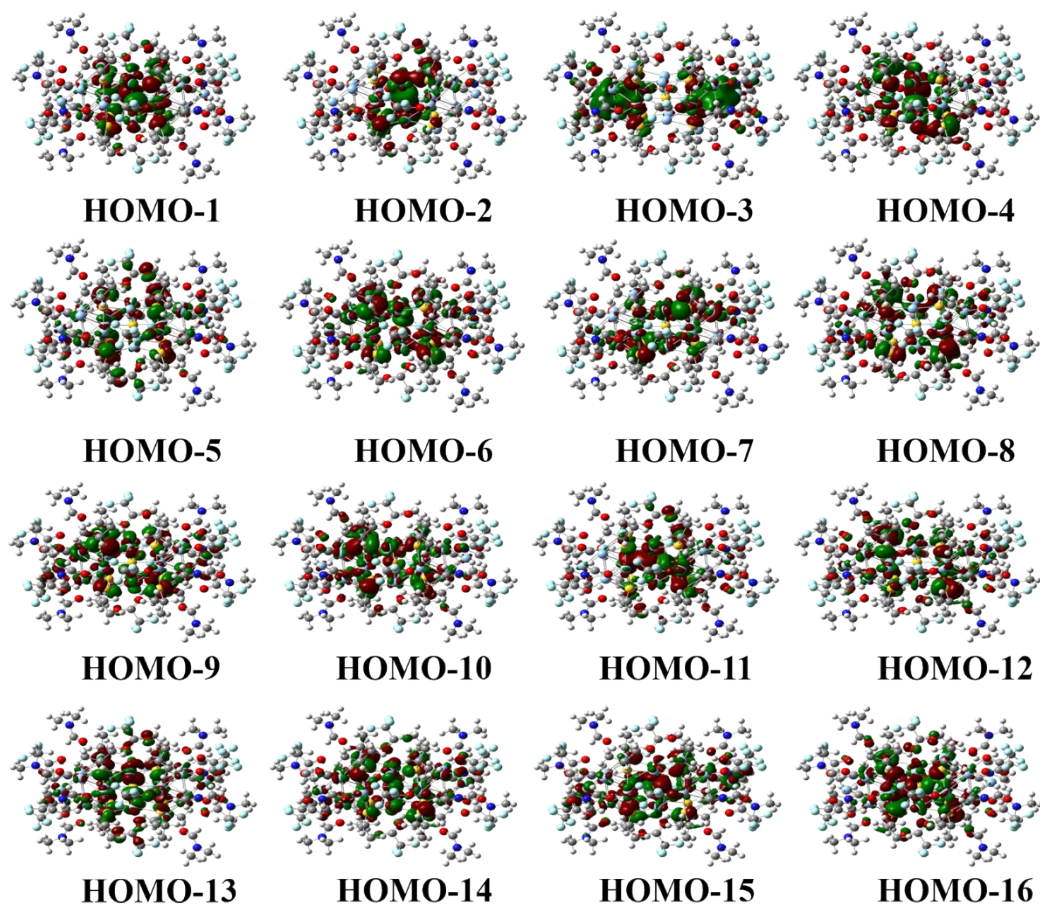

Fig. S19 Orbital diagrams involved in the  $\alpha$ ,  $\beta$ , and  $\gamma$  transitions of  $\text{Ag}_{24}$ .

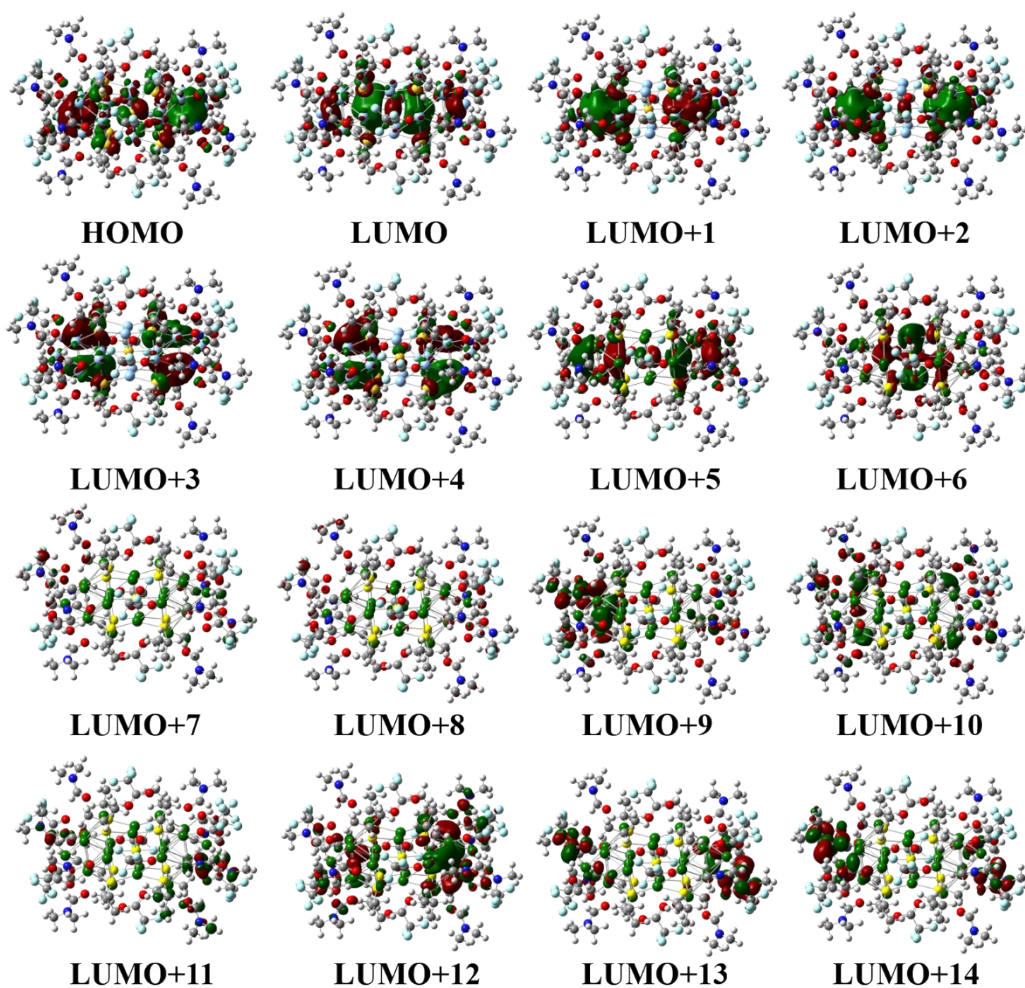

Fig. S20 Frontier orbital diagrams (HOMO, LUMO, and LUMO+1 to LUMO+14) of Ag<sub>24</sub>.

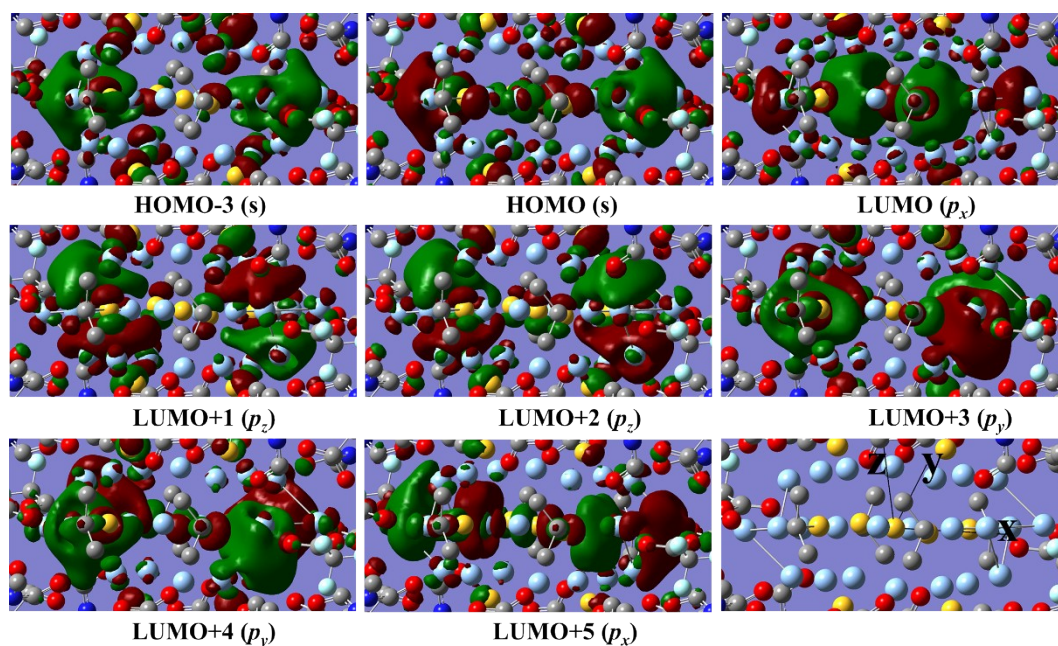

Fig. S21 The local position zoom of superatomic orbitals of Ag<sub>24</sub>.

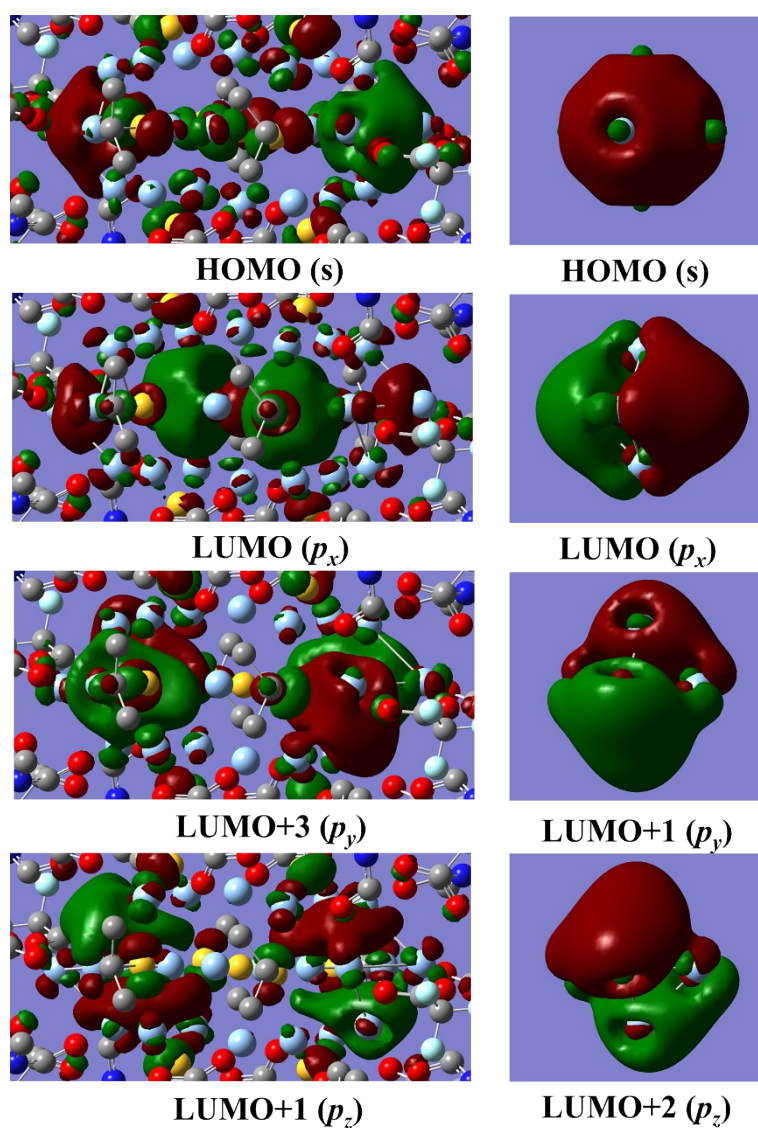

**Fig. S22** The superatomic orbitals of  $\text{Ag}_{24}$  (left) and superatomic orbitals of the highly positively charged core  $\text{Ag}_6^{4+}$  established by removing the ligands of  $\text{Ag}_{24}$  (right).

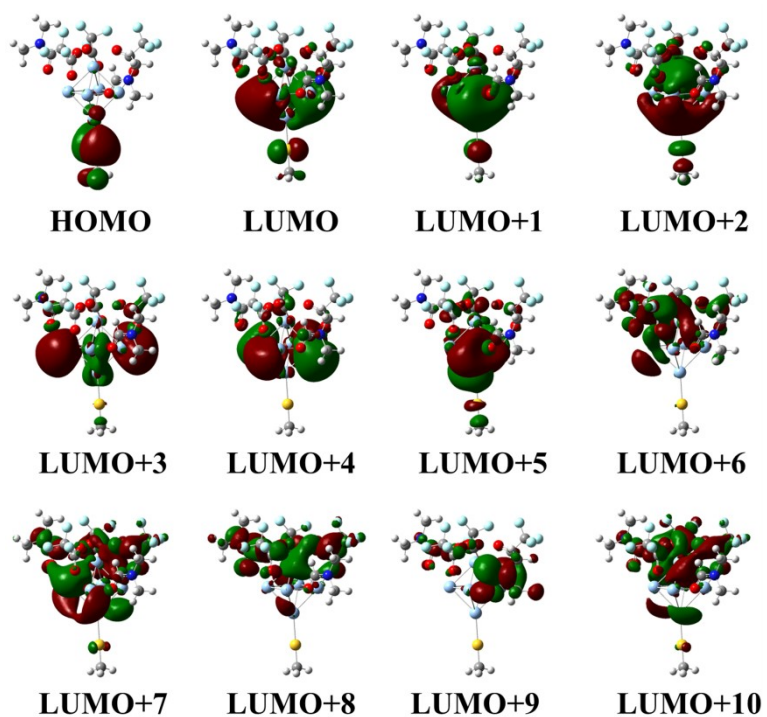

Fig. S23 Frontier orbital diagrams (HOMO, LUMO, and LUMO+1 to LUMO+10) of  $\text{Ag}_6(\text{SCH}_3)(\text{CF}_3\text{COO})_3(\text{DMF})_2$ .

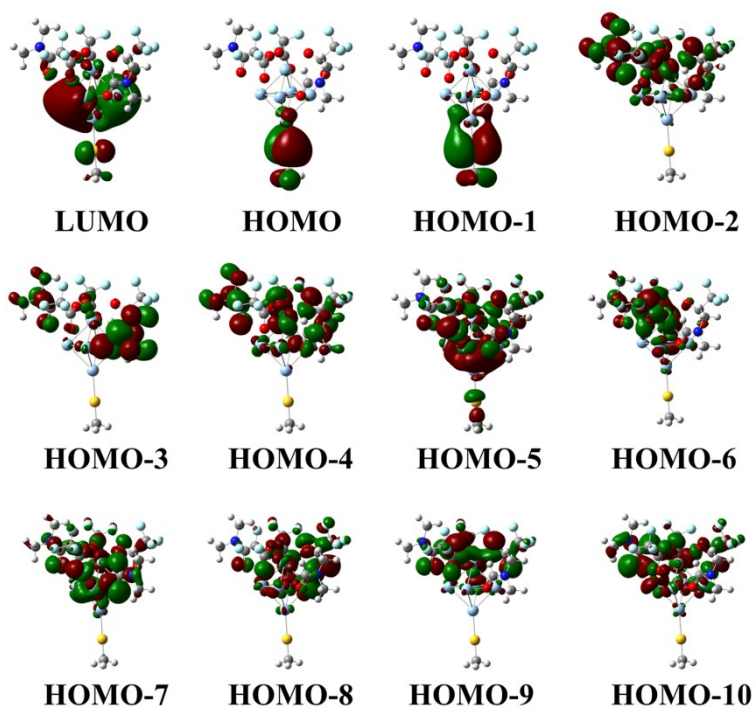

Fig. S24 Frontier orbital diagrams (HOMO, LUMO, and HOMO-1 to HOMO-10) of  $\text{Ag}_6(\text{SCH}_3)(\text{CF}_3\text{COO})_3(\text{DMF})_2$ .

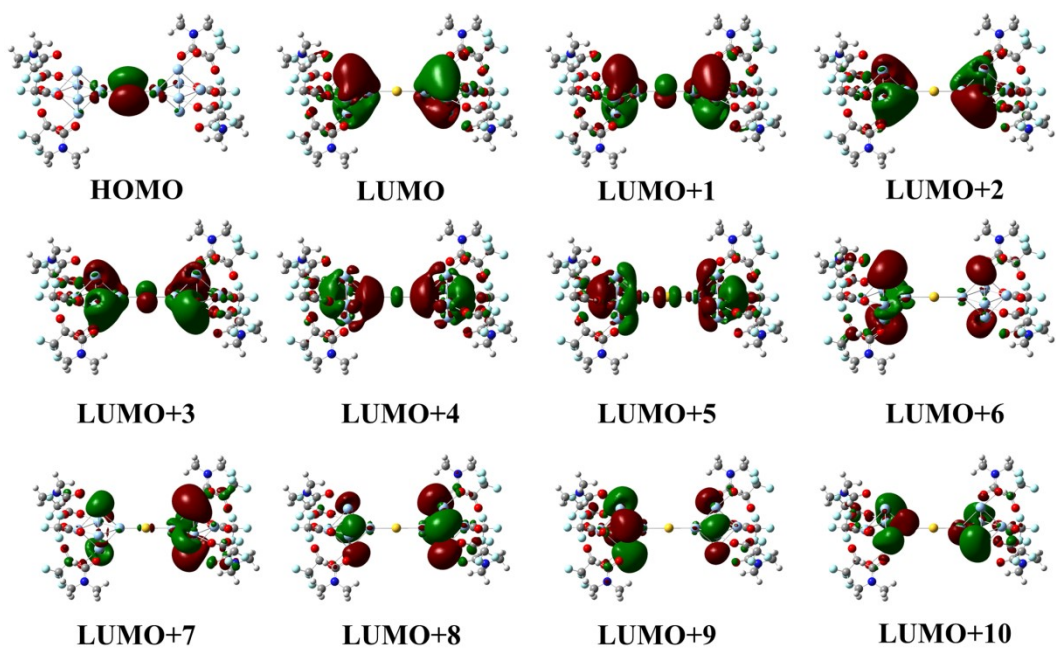

Fig. S25 Frontier orbital diagrams (HOMO, LUMO, and LUMO+1 to LUMO+10) of  $S@{\text{Ag}_6(\text{CF}_3\text{COO})_3(\text{DMF})_2}_2$ .

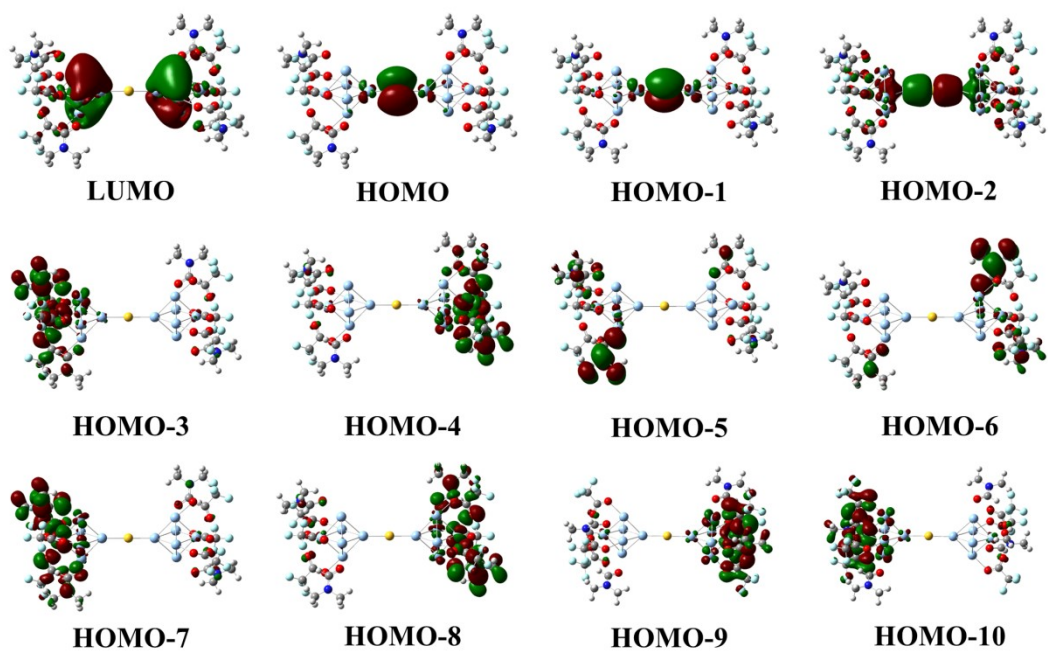

Fig. S26 Frontier orbital diagrams (HOMO, LUMO, and HOMO-1 to HOMO-10) of  $S@{\text{Ag}_6(\text{CF}_3\text{COO})_3(\text{DMF})_2}_2$ .

### 3.6 Characterization of transformation process from Ag<sub>24</sub> to Ag<sub>70</sub>

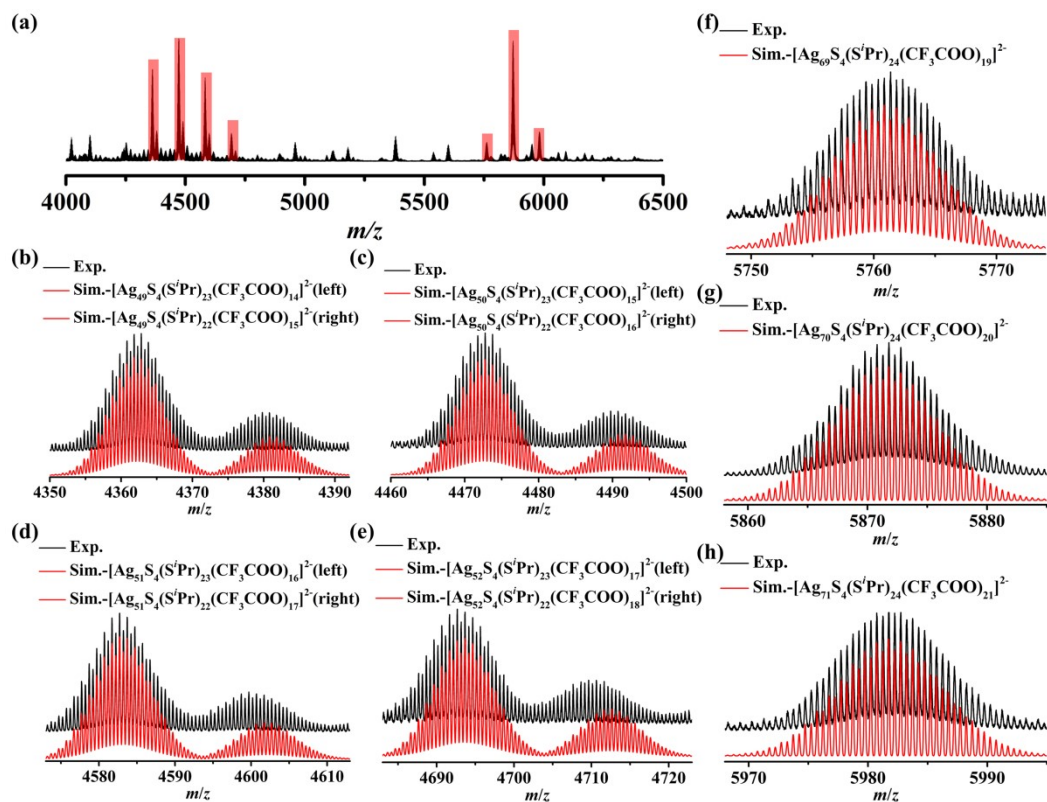

**Fig. S27** (a) Negative ion mode ESI-MS in range of  $m/z = 4000$ – $6500$  of Ag<sub>24</sub> dissolved in MeOH. Experimental (Exp.) and simulated (Sim.) mass spectra of the isotopic envelopes for [Ag<sub>49</sub>S<sub>4</sub>(S'Pr)<sub>23</sub>(CF<sub>3</sub>COO)<sub>14</sub>]<sup>2-</sup> and [Ag<sub>49</sub>S<sub>4</sub>(S'Pr)<sub>22</sub>(CF<sub>3</sub>COO)<sub>15</sub>]<sup>2-</sup> (b), [Ag<sub>50</sub>S<sub>4</sub>(S'Pr)<sub>23</sub>(CF<sub>3</sub>COO)<sub>16</sub>]<sup>2-</sup> and [Ag<sub>50</sub>S<sub>4</sub>(S'Pr)<sub>22</sub>(CF<sub>3</sub>COO)<sub>16</sub>]<sup>2-</sup> (c), [Ag<sub>51</sub>S<sub>4</sub>(S'Pr)<sub>23</sub>(CF<sub>3</sub>COO)<sub>16</sub>]<sup>2-</sup> and [Ag<sub>51</sub>S<sub>4</sub>(S'Pr)<sub>22</sub>(CF<sub>3</sub>COO)<sub>17</sub>]<sup>2-</sup> (d), [Ag<sub>52</sub>S<sub>4</sub>(S'Pr)<sub>23</sub>(CF<sub>3</sub>COO)<sub>17</sub>]<sup>2-</sup> and [Ag<sub>52</sub>S<sub>4</sub>(S'Pr)<sub>22</sub>(CF<sub>3</sub>COO)<sub>18</sub>]<sup>2-</sup> (e), [Ag<sub>69</sub>S<sub>4</sub>(S'Pr)<sub>24</sub>(CF<sub>3</sub>COO)<sub>19</sub>]<sup>2-</sup> (f), [Ag<sub>70</sub>S<sub>4</sub>(S'Pr)<sub>24</sub>(CF<sub>3</sub>COO)<sub>20</sub>]<sup>2-</sup> (g), [Ag<sub>70</sub>S<sub>4</sub>(S'Pr)<sub>24</sub>(CF<sub>3</sub>COO)<sub>20</sub>]<sup>2-</sup>-CF<sub>3</sub>COOAg (h).



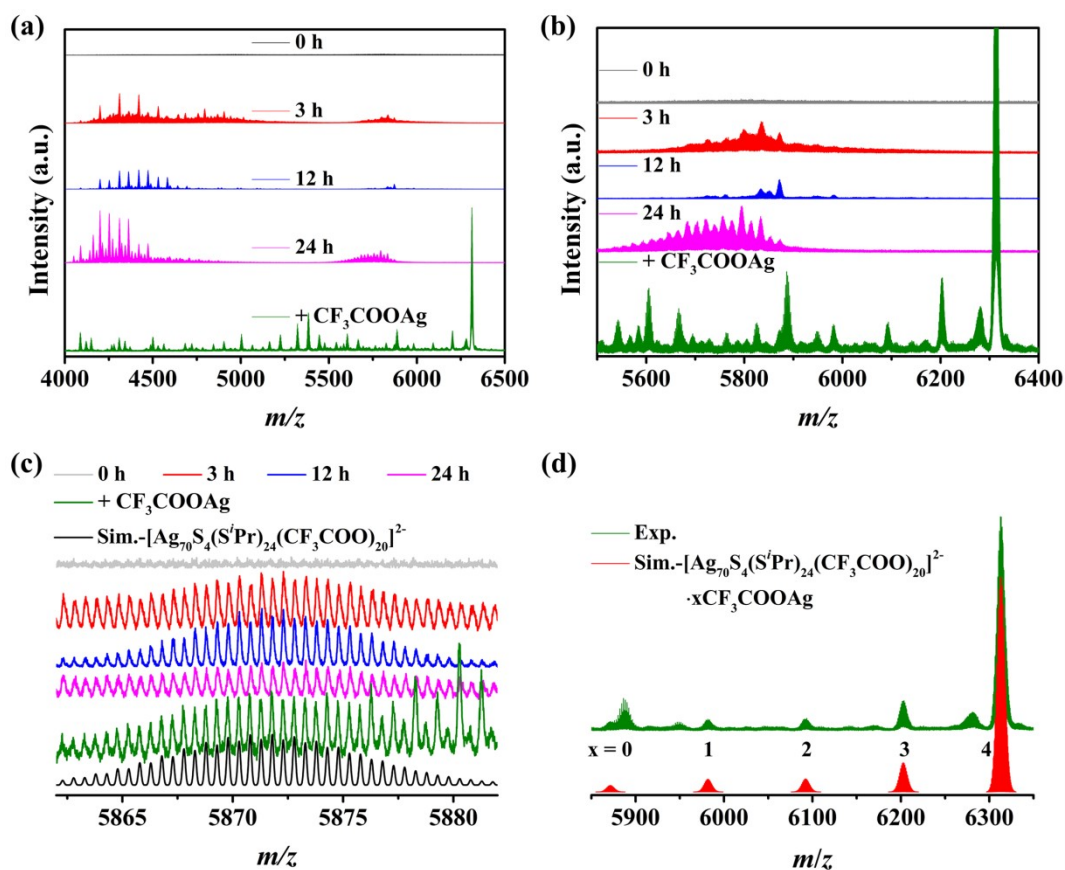

**Fig. S28** (a, b) Time-dependent negative ion mode ESI-MS in range of  $m/z = 4000$ – $6500$  (a) and  $5500$ – $6400$  (b) of  $\text{Ag}_{24}$  dissolved in DMF for tracking the transformation process from  $\text{Ag}_{24}$  to  $\text{Ag}_{70}$ . And ESI-MS data of  $\text{Ag}_{24}$  dissolved in DMF containing a amount of  $\text{CF}_3\text{COOAg}$  salt as a comparison. (c, d) Experimental (Exp.) and simulated (Sim.) mass spectra of the isotopic envelopes for  $[\text{Ag}_{70}\text{S}_4(\text{S}^i\text{Pr})_{24}(\text{CF}_3\text{COO})_{20}]^{2-}$  and  $[\text{Ag}_{70}\text{S}_4(\text{S}^i\text{Pr})_{24}(\text{CF}_3\text{COO})_{20}]^{2-} \cdot (0-4)\text{CF}_3\text{COOAg}$ .

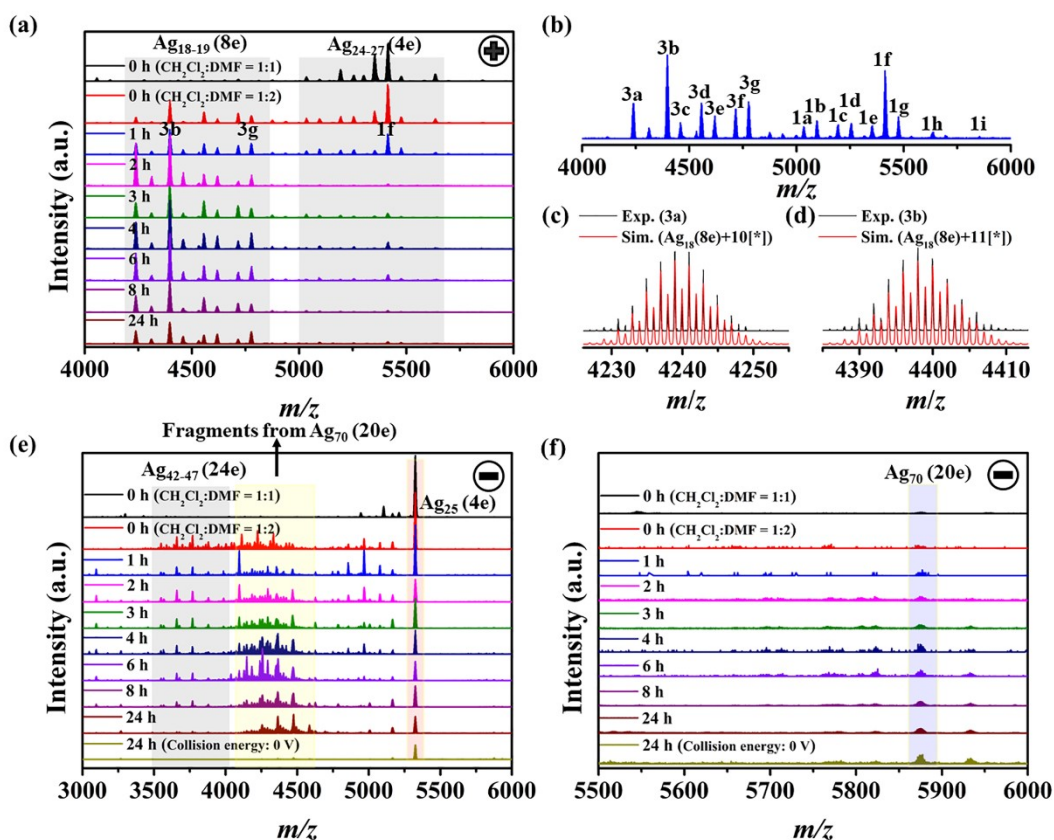

**Fig. S29** Time-dependent ESI-MS spectra from  $\text{Ag}_{24}$  to  $\text{Ag}_{70}$  dissolved in mixture solvent ( $\text{CH}_2\text{Cl}_2$ :DMF = 1:2). (a) Time-dependent position ion mode ESI-MS (collision energy: 2 V) in range of  $m/z = 4000\text{--}6000$  of  $\text{Ag}_{24}$  for tracking the transformation process from  $\text{Ag}_{24}$  to  $\text{Ag}_{70}$ . (b) ESI-MS data after  $\text{Ag}_{24}$  dissolved in mixture solvent ( $\text{CH}_2\text{Cl}_2$ :DMF = 1:2) for one hour. (c) Time-dependent position ion mode ESI-MS (collision energy: 2 V) in range of  $m/z = 3000\text{--}6000$  of  $\text{Ag}_{24}$  for tracking the transformation process from  $\text{Ag}_{24}$  to  $\text{Ag}_{70}$ . (d) Time-dependent position ion mode ESI-MS (collision energy: 2 V) in range of  $m/z = 5500\text{--}6000$  of  $\text{Ag}_{24}$  for tracking the transformation process from  $\text{Ag}_{24}$  to  $\text{Ag}_{70}$ . Note: [\*] =  $[\text{NH}_2(\text{CH}_3)_2][\text{CF}_3\text{COO}]$ .

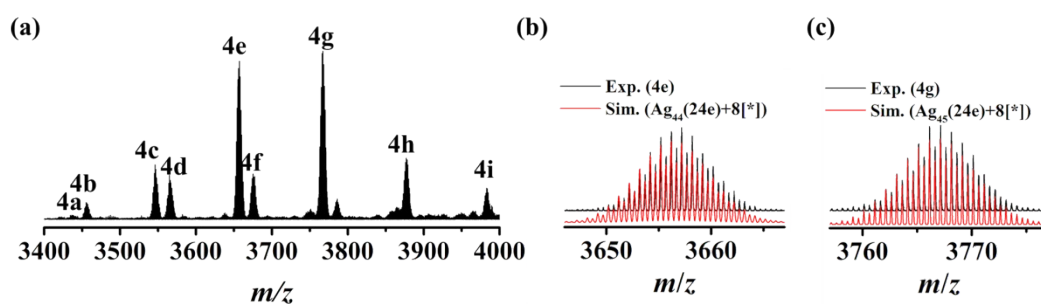

**Fig. S30** (a) ESI-MS data (collision energy: 2 V) in range of  $m/z = 3400\text{--}4000$  after  $\text{Ag}_{24}$  dissolved in mixture solvent ( $\text{CH}_2\text{Cl}_2$ :DMF = 1:2) for three hour, highlighting the 4a–4i corresponding to the  $\{[\text{NH}_2(\text{CH}_3)_2]_8[\text{Ag}_{42+x}\text{S}_4(\text{S}^*\text{Pr})_{11}(\text{CF}_3\text{COO})_{9+x}]^{12-}$  ( $x = 0\text{--}5$ ) peaks.

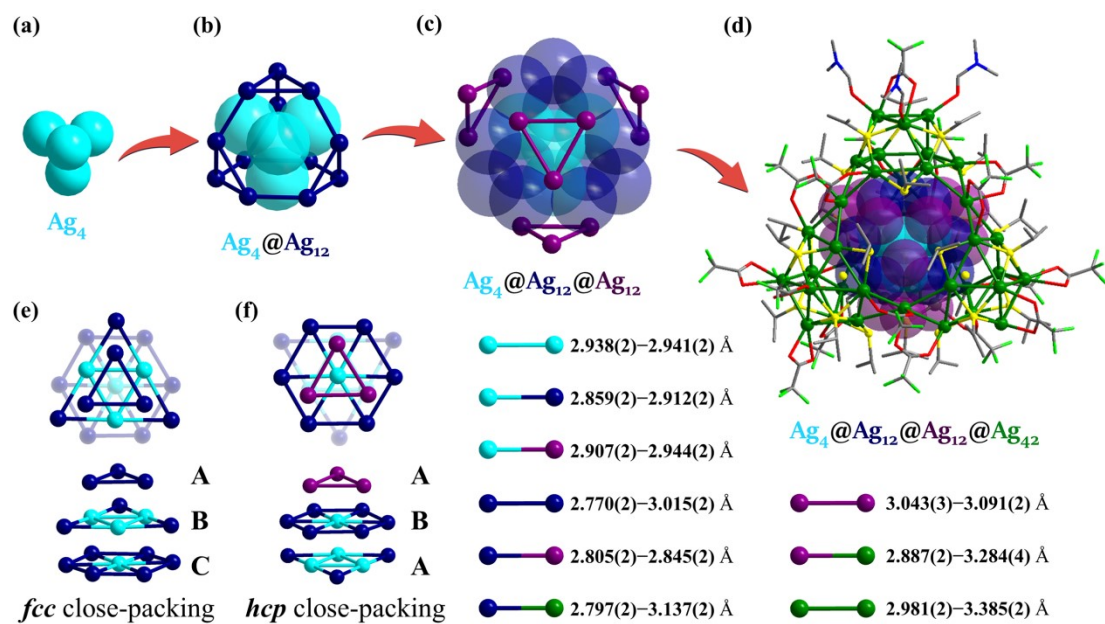

**Fig. S31** The crystal structure of  $Ag_{70}$  ( $[Ag_{70}S_4(S'Pr)_{24}(CF_3COO)_{20}]^{2-}$ ) with a core-shell metal arrangement ( $Ag_4@Ag_{12}@Ag_{12}@Ag_{42}$ ). (a) Innermost  $Ag_4$  tetrahedron. (b) First-shell  $Ag_{12}S_4$  tetrahedron. (c) Second-shell truncated  $Ag_{12}$  tetrahedron. (d) Outermost-shell doubly truncated  $Ag_{42}$  tetrahedron. (e) ABC stacking of Ag atoms in  $Ag_4@Ag_{12}$  core, identified as *fcc* close-packing. (f) ABA stacking of Ag atoms in  $Ag_4@Ag_{12}@Ag_{12}$  core, identified as *hcp* close-packing. Atom color codes: turquoise/dark blue/violet/green, Ag; yellow, S; red, O; bright green, F; blue, N; grey, C. All hydrogen atoms are omitted for clarity.

## Section S4. Supplementary Tables

Table S1. Crystal data collection and structure refinements.

|                                                              | Ag <sub>14</sub>                                                                                               | Ag <sub>24</sub>                                                                                                | Ag <sub>24</sub> -C <sub>2</sub> F <sub>5</sub>                                                                |
|--------------------------------------------------------------|----------------------------------------------------------------------------------------------------------------|-----------------------------------------------------------------------------------------------------------------|----------------------------------------------------------------------------------------------------------------|
| CCDC number                                                  | 2182448                                                                                                        | 2182449                                                                                                         | 2182450                                                                                                        |
| Empirical formula                                            | C <sub>52</sub> H <sub>84</sub> Ag <sub>14</sub> F <sub>24</sub> N <sub>6</sub> O <sub>22</sub> S <sub>6</sub> | C <sub>68</sub> H <sub>112</sub> Ag <sub>24</sub> F <sub>30</sub> N <sub>8</sub> O <sub>28</sub> S <sub>9</sub> | C <sub>62</sub> H <sub>77</sub> Ag <sub>24</sub> F <sub>50</sub> N <sub>5</sub> O <sub>25</sub> S <sub>9</sub> |
| Formula weight                                               | 3303.79                                                                                                        | 4937.07                                                                                                         | 5119.70                                                                                                        |
| Temperature (K)                                              | 200.00(10)                                                                                                     | 200.00(10)                                                                                                      | 200.00(10)                                                                                                     |
| Wavelength (Å)                                               | 1.54184                                                                                                        | 0.71073                                                                                                         | 1.54184                                                                                                        |
| Crystal system                                               | monoclinic                                                                                                     | triclinic                                                                                                       | triclinic                                                                                                      |
| Space group                                                  | <i>C</i> 2/ <i>c</i>                                                                                           | <i>P</i> $\bar{1}$                                                                                              | <i>P</i> $\bar{1}$                                                                                             |
| <i>a</i> (Å)                                                 | 21.4916(4)                                                                                                     | 14.2139(5)                                                                                                      | 14.9116(3)                                                                                                     |
| <i>b</i> (Å)                                                 | 18.1316(4)                                                                                                     | 15.6549(4)                                                                                                      | 16.3962(2)                                                                                                     |
| <i>c</i> (Å)                                                 | 23.7184(4)                                                                                                     | 17.3498(6)                                                                                                      | 18.2438(3)                                                                                                     |
| $\alpha$ (°)                                                 | 90                                                                                                             | 94.120(2)                                                                                                       | 97.091(1)                                                                                                      |
| $\beta$ (°)                                                  | 91.945(2)                                                                                                      | 110.998(3)                                                                                                      | 112.841(2)                                                                                                     |
| $\gamma$ (°)                                                 | 90                                                                                                             | 104.208(2)                                                                                                      | 104.162(1)                                                                                                     |
| <i>V</i> (Å <sup>3</sup> )                                   | 9237.2(3)                                                                                                      | 3439.1(2)                                                                                                       | 3864.9(2)                                                                                                      |
| <i>Z</i>                                                     | 4                                                                                                              | 1                                                                                                               | 1                                                                                                              |
| $\rho_{\text{calc}}$ (g/cm <sup>3</sup> )                    | 2.376                                                                                                          | 2.384                                                                                                           | 2.200                                                                                                          |
| $\mu$ (mm <sup>-1</sup> )                                    | 25.507                                                                                                         | 3.562                                                                                                           | 25.887                                                                                                         |
| <i>F</i> (000)                                               | 6336.0                                                                                                         | 2342.0                                                                                                          | 2406.0                                                                                                         |
| Crystal size (mm)                                            | 0.12 × 0.11 × 0.10                                                                                             | 0.10 × 0.05 × 0.05                                                                                              | 0.08 × 0.07 × 0.06                                                                                             |
| Radiation type                                               | Cu <i>K</i> $\alpha$                                                                                           | Mo <i>K</i> $\alpha$                                                                                            | Cu <i>K</i> $\alpha$                                                                                           |
| 2 $\theta$ range for data collection (°)                     | 7.32 to 132.998                                                                                                | 4.052 to 58.676                                                                                                 | 5.42 to 149.168                                                                                                |
| Limiting indices                                             | -25 ≤ <i>h</i> ≤ 23,<br>-21 ≤ <i>k</i> ≤ 21,<br>-28 ≤ <i>l</i> ≤ 28                                            | -19 ≤ <i>h</i> ≤ 19,<br>-21 ≤ <i>k</i> ≤ 18,<br>-22 ≤ <i>l</i> ≤ 23                                             | -18 ≤ <i>h</i> ≤ 18,<br>-20 ≤ <i>k</i> ≤ 17,<br>-22 ≤ <i>l</i> ≤ 21                                            |
| Reflections collected                                        | 13218                                                                                                          | 54748                                                                                                           | 33822                                                                                                          |
| Independent reflections                                      | 13218<br>[ <i>R</i> <sub>int</sub> = 0.3401,<br><i>R</i> <sub>sigma</sub> = 0.0280]                            | 15940<br>[ <i>R</i> <sub>int</sub> = 0.0456,<br><i>R</i> <sub>sigma</sub> = 0.0512]                             | 15003<br>[ <i>R</i> <sub>int</sub> = 0.0598,<br><i>R</i> <sub>sigma</sub> = 0.0726]                            |
| Data/restraints/parameters                                   | 13218/176/629                                                                                                  | 15940/1065/1093                                                                                                 | 15003/5120/1424                                                                                                |
| Goodness-of-fit on <i>F</i> <sup>2</sup>                     | 1.071                                                                                                          | 1.050                                                                                                           | 1.030                                                                                                          |
| Final <i>R</i> indices [ <i>I</i> > 2 $\sigma$ ( <i>I</i> )] | <i>R</i> <sub>1</sub> = 0.1149,<br><i>wR</i> <sub>2</sub> = 0.3121                                             | <i>R</i> <sub>1</sub> = 0.0727,<br><i>wR</i> <sub>2</sub> = 0.2291                                              | <i>R</i> <sub>1</sub> = 0.0995,<br><i>wR</i> <sub>2</sub> = 0.3071                                             |
| <i>R</i> indices [all data]                                  | <i>R</i> <sub>1</sub> = 0.1220,<br><i>wR</i> <sub>2</sub> = 0.3217                                             | <i>R</i> <sub>1</sub> = 0.1009,<br><i>wR</i> <sub>2</sub> = 0.2493                                              | <i>R</i> <sub>1</sub> = 0.1286,<br><i>wR</i> <sub>2</sub> = 0.3306                                             |
| Largest diff. peak/hole / e Å <sup>-3</sup>                  | 2.88/-3.67                                                                                                     | 2.15/-1.67                                                                                                      | 1.90/-1.59                                                                                                     |

**Table S2.** The distances (Å) of Ag $\cdots$ Ag, Ag–S, and Ag–O in Ag<sub>14</sub>.

|                                                |            |                               |            |                               |            |
|------------------------------------------------|------------|-------------------------------|------------|-------------------------------|------------|
| Ag1 $\cdots$ Ag2                               | 3.0044(19) | Ag1 $\cdots$ Ag5              | 3.335(2)   | Ag1 $\cdots$ Ag7 <sup>1</sup> | 2.9512(19) |
| Ag2 $\cdots$ Ag3                               | 3.072(2)   | Ag2 $\cdots$ Ag6 <sup>1</sup> | 2.9985(19) | Ag2 $\cdots$ Ag7 <sup>1</sup> | 2.993(2)   |
| Ag3 $\cdots$ Ag4                               | 2.992(2)   | Ag3 $\cdots$ Ag6 <sup>1</sup> | 3.0747(19) | Ag3 $\cdots$ Ag7              | 3.001(2)   |
| Ag5 $\cdots$ Ag4                               | 2.936(2)   | Ag7 $\cdots$ Ag4              | 2.907(2)   | Ag5 $\cdots$ Ag6              | 2.835(2)   |
| Ag1–S1                                         | 2.486(5)   | Ag1–S3 <sup>1</sup>           | 2.520(4)   | Ag2–S1                        | 2.533(5)   |
| Ag2–S2 <sup>1</sup>                            | 2.621(4)   | Ag3–S1                        | 2.527(5)   | Ag3–S3                        | 2.550(4)   |
| Ag4–S1                                         | 2.518(5)   | Ag4–S2                        | 2.665(4)   | Ag5–S2                        | 2.682(4)   |
| Ag6–S2                                         | 2.633(4)   | Ag6–S3 <sup>1</sup>           | 2.502(5)   | Ag7–S2                        | 2.474(4)   |
| Ag7–S3                                         | 2.461(4)   |                               |            |                               |            |
| Ag1–O4                                         | 2.342(16)  | Ag1–O9                        | 2.492(15)  | Ag2–O2                        | 2.50(2)    |
| Ag2–O3                                         | 2.381(16)  | Ag3–O1                        | 2.39(2)    | Ag3–O5                        | 2.397(16)  |
| Ag4–O6                                         | 2.243(16)  | Ag4–O10                       | 2.511(13)  | Ag5–O7                        | 2.309(17)  |
| Ag5–O9                                         | 2.41(2)    | Ag5–O10                       | 2.478(15)  | Ag6–O8                        | 2.268(16)  |
| Ag7–O11                                        | 2.28(2)    |                               |            |                               |            |
| Symmetry code: <sup>1</sup> 3/2-x, 3/2-y, 1-z. |            |                               |            |                               |            |

**Table S3.** The distances (Å) of Ag $\cdots$ Ag, Ag–S, and Ag–O in Ag<sub>24</sub>.

|                                            |            |                                |            |                               |            |
|--------------------------------------------|------------|--------------------------------|------------|-------------------------------|------------|
| Ag1A $\cdots$ Ag2                          | 2.739(8)   | Ag1B $\cdots$ Ag2              | 2.802(13)  | Ag2 $\cdots$ Ag3              | 2.7781(11) |
| Ag1A $\cdots$ Ag3                          | 2.779(9)   | Ag1B $\cdots$ Ag3              | 2.94(2)    | Ag2 $\cdots$ Ag4              | 2.7774(11) |
| Ag1A $\cdots$ Ag5                          | 2.820(9)   | Ag1B $\cdots$ Ag5              | 2.827(10)  | Ag2 $\cdots$ Ag5              | 2.8023(12) |
| Ag1A $\cdots$ Ag6                          | 2.750(9)   | Ag1B $\cdots$ Ag6              | 2.857(18)  | Ag3 $\cdots$ Ag4              | 2.8306(12) |
| Ag1A $\cdots$ Ag9                          | 3.043(8)   | Ag1B $\cdots$ Ag9              | 3.134(16)  | Ag3 $\cdots$ Ag6              | 2.8436(11) |
| Ag1A $\cdots$ Ag10                         | 3.073(10)  | Ag1B $\cdots$ Ag10             | 3.003(13)  | Ag3 $\cdots$ Ag8              | 3.1452(12) |
| Ag4 $\cdots$ Ag5                           | 2.8213(13) | Ag5 $\cdots$ Ag6               | 2.8545(11) | Ag3 $\cdots$ Ag9              | 3.0768(12) |
| Ag4 $\cdots$ Ag6                           | 2.8173(11) | Ag5 $\cdots$ Ag7               | 3.0907(13) | Ag6 $\cdots$ Ag7              | 3.2381(12) |
| Ag4 $\cdots$ Ag7                           | 3.1108(13) | Ag5 $\cdots$ Ag10              | 3.1103(12) | Ag6 $\cdots$ Ag8              | 3.2293(12) |
| Ag4 $\cdots$ Ag8                           | 3.1692(12) | Ag8 $\cdots$ Ag12 <sup>1</sup> | 3.363(5)   | Ag6 $\cdots$ Ag9              | 3.2268(12) |
| Ag7 $\cdots$ Ag12 <sup>1</sup>             | 3.354(4)   | Ag8 $\cdots$ Ag1 <sup>1</sup>  | 3.226(10)  | Ag6 $\cdots$ Ag10             | 3.2124(12) |
| Ag7 $\cdots$ Ag1 <sup>1</sup>              | 3.350(7)   | Ag9 $\cdots$ Ag11 <sup>1</sup> | 3.2245(15) | Ag6 $\cdots$ Ag1 <sup>1</sup> | 3.31(2)    |
| Ag10 $\cdots$ Ag11                         | 3.3471(16) | Ag10 $\cdots$ Ag1              | 3.351(7)   |                               |            |
| Ag1–S4                                     | 2.568(14)  | Ag1–S5                         | 2.34(3)    | Ag1–S21                       | 2.542(10)  |
| Ag1A–S4                                    | 2.568(9)   | Ag1B–S                         | 2.533(10)  | Ag3–S1                        | 2.535(3)   |
| Ag4–S2                                     | 2.547(2)   | Ag5–S3                         | 2.574(3)   | Ag6–S5                        | 2.5265(7)  |
| Ag7–S2                                     | 2.522(3)   | Ag8–S1                         | 2.504(3)   | Ag9–S1                        | 2.521(3)   |
| Ag7–S3                                     | 2.514(3)   | Ag8–S2                         | 2.510(3)   | Ag9–S4                        | 2.511(3)   |
| Ag10–S3                                    | 2.523(3)   | Ag11–S1 <sup>1</sup>           | 2.457(3)   | Ag11–S3                       | 2.456(3)   |
| Ag10–S4                                    | 2.521(3)   | Ag11–S5                        | 2.6191(12) | Ag12–S2 <sup>1</sup>          | 2.388(5)   |
| Ag12–S4                                    | 2.387(4)   | Ag12 $\cdots$ S5               | 2.938(17)  |                               |            |
| Ag1A–O8                                    | 2.32(2)    | Ag1B–O                         | 2.23(3)    | Ag3–O7                        | 2.249(11)  |
| Ag2–O3                                     | 2.372(12)  | Ag4–O11                        | 2.29(2)    | Ag4–O13                       | 2.29(2)    |
| Ag2–O4                                     | 2.351(10)  | Ag5–O10                        | 2.260(12)  | Ag5–O20                       | 2.48(2)    |
| Ag2–O5                                     | 2.369(10)  | Ag7–O2 <sup>1</sup>            | 2.511(15)  | Ag7–O12                       | 2.39(2)    |
| Ag8–O9                                     | 2.348(15)  | Ag8–O17                        | 2.30(4)    | Ag9–O6                        | 2.333(12)  |
| Ag9–O18                                    | 2.452(10)  | Ag10–O1 <sup>1</sup>           | 2.584(10)  | Ag10–O14 <sup>1</sup>         | 2.27(3)    |
| Ag10–O19                                   | 2.46(3)    |                                |            |                               |            |
| Symmetry code: <sup>1</sup> 1-x, 1-y, 1-z. |            |                                |            |                               |            |

**Table S4.** The Ag...Ag distances of Ag<sub>6</sub> octahedral core in Ag cluster reported.

|                               | Formula                                                                                                                                                                             | Ag...Ag distances (Å)    | Average (Å)  | Ref.             |
|-------------------------------|-------------------------------------------------------------------------------------------------------------------------------------------------------------------------------------|--------------------------|--------------|------------------|
|                               | TBA <sub>8</sub> [Ag <sub>6</sub> (H <sub>2</sub> SiW <sub>10</sub> O <sub>36</sub> ) <sub>2</sub> ]·5H <sub>2</sub> O                                                              | 2.715(2)–2.858(2)        | 2.764        | 9                |
|                               | [Ag(CH <sub>3</sub> CN)] <sub>2</sub> [Ag <sub>6</sub> Ti <sub>16</sub> O <sub>22</sub> (PhCOO) <sub>26</sub> (CH <sub>3</sub> CN) <sub>2</sub> ]                                   | 2.690(2)–2.776(2)        | 2.752        | 10               |
|                               | Ag <sub>6</sub> Ti <sub>16</sub> O <sub>20</sub> (PhCOO) <sub>24</sub> (CH <sub>3</sub> COO) <sub>4</sub> (CH <sub>3</sub> CN) <sub>2</sub>                                         | 2.731(3)–2.741(2)        | 2.734        | 10               |
|                               | [Ag <sub>14</sub> (C <sub>2</sub> B <sub>10</sub> H <sub>10</sub> S <sub>2</sub> ) <sub>6</sub> (CH <sub>3</sub> CN) <sub>8</sub> ]·4CH <sub>3</sub> CN                             | 2.745(2)–2.774(1)        | 2.764        | 11               |
|                               | [Ag <sub>6</sub> @(MoO <sub>4</sub> ) <sub>7</sub> @Ag <sub>36</sub> (MoO <sub>4</sub> ) <sub>2</sub> (PrS) <sub>28</sub> ( <i>p</i> -TOS) <sub>14</sub> (DMF) <sub>4</sub> ]       | 2.659(5)–2.852(4)        | 2.756        | 12               |
|                               | [Ag <sub>14</sub> (pntp) <sub>10</sub> (dpph) <sub>4</sub> Cl <sub>2</sub> ]                                                                                                        | 2.800(1)–2.853(1)        | 2.821        | 13               |
|                               | [Ag <sub>14</sub> (SC <sub>6</sub> H <sub>3</sub> F <sub>2</sub> ) <sub>12</sub> (PPh <sub>3</sub> ) <sub>8</sub> ]                                                                 | 2.814(2)–2.852(2)        | 2.838        | 14               |
| Ag <sub>6</sub> <sup>4+</sup> | [Ag <sub>14</sub> (SPh(CF <sub>3</sub> ) <sub>2</sub> ) <sub>12</sub> (PPh <sub>3</sub> ) <sub>4</sub> (DMF) <sub>4</sub> ]                                                         | 2.834(1)–2.865(1)        | 2.852        | 15               |
|                               | [Ag <sub>14</sub> (NLA) <sub>6</sub> (PPh <sub>3</sub> ) <sub>8</sub> ]                                                                                                             | 2.842(1)–2.846(1)        | 2.844        | 16               |
|                               | [Ag <sub>14</sub> (FBT) <sub>12</sub> (PPh <sub>3</sub> ) <sub>8</sub> ]                                                                                                            | 2.832(2)–2.847(1)        | 2.840        | 17               |
|                               | [Ag <sub>6</sub> @(MoO <sub>4</sub> ) <sub>7</sub> @Ag <sub>60</sub> (MoO <sub>4</sub> ) <sub>2</sub> (PrS) <sub>28</sub> (PhCOO) <sub>18</sub> (CH <sub>3</sub> OH) <sub>2</sub> ] | 2.659(6)–2.855(3)        | 2.764        | 18               |
|                               | [Ag <sub>6</sub> @(CrO <sub>4</sub> ) <sub>8</sub> @Ag <sub>32</sub> (PrS) <sub>30</sub> (DMF) <sub>14</sub> ]·10BF <sub>4</sub> ·2DMF                                              | 2.773(1)–2.862(1)        | 2.818        | 19               |
|                               | [TBA <sub>8</sub> H <sub>6</sub> Ag <sub>6</sub> (SiW <sub>9</sub> O <sub>33</sub> ) <sub>2</sub> (DMF)] <sup>2+</sup>                                                              | 2.685(2)–2.847(1)        | 2.771        | 20               |
|                               | (TBA) <sub>2</sub> {Ag <sub>6</sub> Ti <sub>6</sub> (Sal) <sub>x</sub> (L1) <sub>6</sub> (HL1) <sub>6-x</sub> } (x = 0-3)                                                           | 2.760(1)–2.813(1)        | 2.784        | 21               |
|                               | <b>S@Ag<sub>24</sub>(S'Pr)<sub>8</sub>(CF<sub>3</sub>COO)<sub>10</sub>(DMF)<sub>10</sub></b>                                                                                        | <b>2.767(4)–2.853(3)</b> | <b>2.805</b> | <b>This work</b> |
|                               | [Ag <sub>6</sub> S <sub>4</sub> @Ag <sub>36</sub> ( <i>t</i> BuPhS) <sub>24</sub> (CF <sub>3</sub> COO) <sub>6</sub> (H <sub>2</sub> O) <sub>12</sub> ]·4CF <sub>3</sub> COO        | 2.928(4)–2.968(3)        | 2.941        | 22               |
|                               | [Ag <sub>6</sub> Se <sub>4</sub> @Ag <sub>36</sub> ( <i>t</i> BuPhS) <sub>24</sub> (CF <sub>3</sub> COO) <sub>6</sub> (H <sub>2</sub> O) <sub>12</sub> ]·4CF <sub>3</sub> COO       | 2.936(3)–2.984(3)        | 2.965        | 22               |
| Ag <sub>6</sub> <sup>6+</sup> | [Ag <sub>6</sub> S <sub>4</sub> @Ag <sub>36</sub> Ti <sub>4</sub> (S'Pr) <sub>18</sub> (SA) <sub>12</sub> (SO <sub>4</sub> ) <sub>4</sub> ]·8MeOH                                   | 2.845(1)–3.106(1)        | 2.961        | 23               |
|                               | [Ag <sub>6</sub> L <sub>6</sub> /D <sub>6</sub> ]                                                                                                                                   | 2.957(2)–3.332(2)        | 3.210        | 24               |
|                               | [Ag <sub>6</sub> PL <sub>6</sub> /PD <sub>6</sub> ]                                                                                                                                 | 2.948(2)–3.442(2)        | 3.136        | 24               |

Hpnpt = *p*-nitrothiophenol; dpph = 1,6-bis(diphenylphosphino)hexane; NLA = D,L-6,8-thioctamide; FBT = 4-fluorothiophenol; SA = salicylate; L/D = (*S*/*R*)-4-isopropylthiazolidine-2-thione; PL/PD = (*S*/*R*)-2-phenylglycinol; TBA<sup>+</sup> = tetrabutylamine; H<sub>3</sub>L1 = 2,6-dihydroxybenzoic acid

**Table S5.** The assigned formula of species found in ESI-MS (**Ag<sub>24</sub>** in CH<sub>2</sub>Cl<sub>2</sub>/DMF (v:v = 1:1); Declustering potential: 40 V; Collision energy: 2 V). Note: [\*] = [NH<sub>2</sub>(CH<sub>3</sub>)<sub>2</sub>][CF<sub>3</sub>COO].

| Peak                                      | Formula                                                                                                                                                     | Cal.    | Exp.    |
|-------------------------------------------|-------------------------------------------------------------------------------------------------------------------------------------------------------------|---------|---------|
| <b>1a</b><br>(Ag <sub>24</sub> (4e)+5[*]) | {[NH <sub>2</sub> (CH <sub>3</sub> ) <sub>2</sub> ] <sub>5</sub> Ag <sub>24</sub> S(S'Pr) <sub>8</sub> (CF <sub>3</sub> COO) <sub>14</sub> } <sup>+</sup>   | 5034.02 | 5034.02 |
| <b>1b</b><br>(Ag <sub>25</sub> (4e)+4[*]) | {[NH <sub>2</sub> (CH <sub>3</sub> ) <sub>2</sub> ] <sub>4</sub> Ag <sub>25</sub> S(S'Pr) <sub>8</sub> (CF <sub>3</sub> COO) <sub>14</sub> } <sup>+</sup>   | 5096.86 | 5096.88 |
| <b>1c</b><br>(Ag <sub>24</sub> (4e)+6[*]) | {[NH <sub>2</sub> (CH <sub>3</sub> ) <sub>2</sub> ] <sub>6</sub> Ag <sub>24</sub> S(S'Pr) <sub>8</sub> (CF <sub>3</sub> COO) <sub>15</sub> } <sup>+</sup>   | 5193.08 | 5193.11 |
| <b>1d</b><br>(Ag <sub>25</sub> (4e)+5[*]) | {[NH <sub>2</sub> (CH <sub>3</sub> ) <sub>2</sub> ] <sub>5</sub> Ag <sub>25</sub> S(S'Pr) <sub>8</sub> (CF <sub>3</sub> COO) <sub>15</sub> } <sup>+</sup>   | 5255.91 | 5255.91 |
| <b>1e</b><br>(Ag <sub>24</sub> (4e)+7[*]) | {[NH <sub>2</sub> (CH <sub>3</sub> ) <sub>2</sub> ] <sub>7</sub> Ag <sub>24</sub> S(S'Pr) <sub>8</sub> (CF <sub>3</sub> COO) <sub>16</sub> } <sup>+</sup>   | 5352.13 | 5352.16 |
| <b>1f</b><br>(Ag <sub>25</sub> (4e)+6[*]) | {[NH <sub>2</sub> (CH <sub>3</sub> ) <sub>2</sub> ] <sub>6</sub> Ag <sub>25</sub> S(S'Pr) <sub>8</sub> (CF <sub>3</sub> COO) <sub>16</sub> } <sup>+</sup>   | 5414.97 | 5414.97 |
| <b>1g</b><br>(Ag <sub>26</sub> (4e)+5[*]) | {[NH <sub>2</sub> (CH <sub>3</sub> ) <sub>2</sub> ] <sub>5</sub> Ag <sub>26</sub> S(S'Pr) <sub>8</sub> (CF <sub>3</sub> COO) <sub>16</sub> } <sup>+</sup>   | 5475.80 | 5475.81 |
| <b>1h</b><br>(Ag <sub>26</sub> (4e)+6[*]) | {[NH <sub>2</sub> (CH <sub>3</sub> ) <sub>2</sub> ] <sub>6</sub> Ag <sub>26</sub> S(S'Pr) <sub>8</sub> (CF <sub>3</sub> COO) <sub>17</sub> } <sup>+</sup>   | 5634.86 | 5634.91 |
| <b>1i</b><br>(Ag <sub>27</sub> (4e)+6[*]) | {[NH <sub>2</sub> (CH <sub>3</sub> ) <sub>2</sub> ] <sub>6</sub> Ag <sub>27</sub> S(S'Pr) <sub>8</sub> (CF <sub>3</sub> COO) <sub>18</sub> } <sup>+</sup>   | 5856.75 | 5856.77 |
| <b>2a</b><br>(Ag <sub>24</sub> (4e)+3[*]) | {[NH <sub>2</sub> (CH <sub>3</sub> ) <sub>2</sub> ] <sub>3</sub> [Ag <sub>24</sub> S(S'Pr) <sub>8</sub> (CF <sub>3</sub> COO) <sub>14</sub> ]} <sup>-</sup> | 4941.89 | 4941.87 |
| <b>2b</b><br>Ag <sub>24</sub> (4e)+4[*])  | {[NH <sub>2</sub> (CH <sub>3</sub> ) <sub>2</sub> ] <sub>4</sub> [Ag <sub>24</sub> S(S'Pr) <sub>8</sub> (CF <sub>3</sub> COO) <sub>15</sub> ]} <sup>-</sup> | 5100.94 | 5100.93 |
| <b>2c</b><br>Ag <sub>25</sub> (4e)+3[*])  | {[NH <sub>2</sub> (CH <sub>3</sub> ) <sub>2</sub> ] <sub>3</sub> [Ag <sub>25</sub> S(S'Pr) <sub>8</sub> (CF <sub>3</sub> COO) <sub>15</sub> ]} <sup>-</sup> | 5163.78 | 5163.76 |
| <b>2d</b><br>Ag <sub>25</sub> (4e)+4[*])  | {[NH <sub>2</sub> (CH <sub>3</sub> ) <sub>2</sub> ] <sub>4</sub> [Ag <sub>25</sub> S(S'Pr) <sub>8</sub> (CF <sub>3</sub> COO) <sub>16</sub> ]} <sup>-</sup> | 5322.83 | 5322.83 |
| <b>2e</b><br>(Ag <sub>26</sub> (4e)+4[*]) | {[NH <sub>2</sub> (CH <sub>3</sub> ) <sub>2</sub> ] <sub>4</sub> [Ag <sub>26</sub> S(S'Pr) <sub>8</sub> (CF <sub>3</sub> COO) <sub>17</sub> ]} <sup>-</sup> | 5542.72 | 5542.72 |

**Table S6.** The assigned formula of species found in ESI-MS (**Ag<sub>24</sub>** in CH<sub>2</sub>Cl<sub>2</sub>/PrOH (v:v = 4:1); Declustering potential: 40 V; Collision energy: 2 V). Note: [\*] = [NH<sub>2</sub>(CH<sub>3</sub>)<sub>2</sub>][CF<sub>3</sub>COO].

| Peak                                      | Formula                                                                                                                                                      | Cal.    | Exp.    |
|-------------------------------------------|--------------------------------------------------------------------------------------------------------------------------------------------------------------|---------|---------|
| <b>2f</b><br>(Ag <sub>24</sub> (4e)+0[*]) | {[NH <sub>2</sub> (CH <sub>3</sub> ) <sub>2</sub> ] <sub>0</sub> [Ag <sub>24</sub> S(S'Pr) <sub>8</sub> (CF <sub>3</sub> COO) <sub>12</sub> ]} <sup>2-</sup> | 2288.86 | 2288.86 |
| <b>2g</b><br>(Ag <sub>24</sub> (4e)+1[*]) | {[NH <sub>2</sub> (CH <sub>3</sub> ) <sub>2</sub> ] <sub>1</sub> [Ag <sub>24</sub> S(S'Pr) <sub>8</sub> (CF <sub>3</sub> COO) <sub>13</sub> ]} <sup>2-</sup> | 2368.39 | 2368.39 |
| <b>2h</b><br>(Ag <sub>25</sub> (4e)+0[*]) | {[NH <sub>2</sub> (CH <sub>3</sub> ) <sub>2</sub> ] <sub>0</sub> [Ag <sub>25</sub> S(S'Pr) <sub>8</sub> (CF <sub>3</sub> COO) <sub>13</sub> ]} <sup>2-</sup> | 2399.81 | 2399.82 |
| <b>2i</b><br>(Ag <sub>24</sub> (4e)+2[*]) | {[NH <sub>2</sub> (CH <sub>3</sub> ) <sub>2</sub> ] <sub>2</sub> [Ag <sub>24</sub> S(S'Pr) <sub>8</sub> (CF <sub>3</sub> COO) <sub>14</sub> ]} <sup>2-</sup> | 2447.91 | 2447.92 |
| <b>2j</b><br>(Ag <sub>25</sub> (4e)+1[*]) | {[NH <sub>2</sub> (CH <sub>3</sub> ) <sub>2</sub> ] <sub>1</sub> [Ag <sub>25</sub> S(S'Pr) <sub>8</sub> (CF <sub>3</sub> COO) <sub>14</sub> ]} <sup>2-</sup> | 2479.33 | 2479.34 |
| <b>2k</b><br>(Ag <sub>24</sub> (4e)+3[*]) | {[NH <sub>2</sub> (CH <sub>3</sub> ) <sub>2</sub> ] <sub>3</sub> [Ag <sub>24</sub> S(S'Pr) <sub>8</sub> (CF <sub>3</sub> COO) <sub>15</sub> ]} <sup>2-</sup> | 2527.44 | 2527.45 |
| <b>2l</b><br>(Ag <sub>25</sub> (4e)+2[*]) | {[NH <sub>2</sub> (CH <sub>3</sub> ) <sub>2</sub> ] <sub>2</sub> [Ag <sub>25</sub> S(S'Pr) <sub>8</sub> (CF <sub>3</sub> COO) <sub>15</sub> ]} <sup>2-</sup> | 2558.86 | 2558.86 |
| <b>2m</b><br>(Ag <sub>25</sub> (4e)+3[*]) | {[NH <sub>2</sub> (CH <sub>3</sub> ) <sub>2</sub> ] <sub>3</sub> [Ag <sub>25</sub> S(S'Pr) <sub>8</sub> (CF <sub>3</sub> COO) <sub>16</sub> ]} <sup>2-</sup> | 2638.38 | 2638.39 |
| <b>2n</b><br>(Ag <sub>25</sub> (4e)+4[*]) | {[NH <sub>2</sub> (CH <sub>3</sub> ) <sub>2</sub> ] <sub>4</sub> [Ag <sub>25</sub> S(S'Pr) <sub>8</sub> (CF <sub>3</sub> COO) <sub>17</sub> ]} <sup>2-</sup> | 2717.91 | 2717.92 |

**Table S7.** Transition energy, oscillator strength, and orbital contributions of the strongest electronic excitations of **Ag<sub>24</sub>**.

| Wavelength (nm) | Osc. Strength | Major contribs                                                      |
|-----------------|---------------|---------------------------------------------------------------------|
| 406.4760889     | 0.0165        | H-2->LUMO (27%), H-1->LUMO (65%)                                    |
| 402.9095822     | 0.1471        | H-2->LUMO (33%), H-1->LUMO (12%), HOMO->LUMO (42%)                  |
| 393.6603799     | 0.4173        | H-2->LUMO (34%), H-1->LUMO (10%), HOMO->LUMO (50%)                  |
| 369.8786893     | 0.0233        | H-5->LUMO (22%), H-3->LUMO (57%), HOMO->L+1 (11%)                   |
| 369.4048108     | 0.1309        | H-3->L+2 (10%), HOMO->L+1 (65%)                                     |
| 360.962317      | 0.0446        | H-1->L+1 (74%)                                                      |
| 357.5376666     | 0.0347        | H-2->L+1 (68%), HOMO->L+3 (10%)                                     |
| 356.3456346     | 0.0279        | H-7->LUMO (21%), H-1->L+2 (23%), HOMO->L+3 (12%)                    |
| 356.0488675     | 0.114         | H-2->L+1 (10%), H-1->L+2 (13%), HOMO->L+3 (46%)                     |
| 348.0331704     | 0.0224        | H-4->L+1 (35%), H-1->L+3 (44%)                                      |
| 344.4077242     | 0.0252        | H-2->L+3 (69%)                                                      |
| 339.3085294     | 0.011         | H-11->LUMO (45%), H-6->L+1 (28%)                                    |
| 338.0226741     | 0.0607        | H-11->LUMO (28%), H-6->L+1 (32%)                                    |
| 334.0698317     | 0.049         | H-4->L+3 (73%)                                                      |
| 325.5266538     | 0.0438        | H-12->LUMO (17%), H-6->L+4 (11%), H-3->L+2 (28%)                    |
| 325.0061252     | 0.0343        | H-12->LUMO (18%), H-3->L+2 (23%)                                    |
| 323.6317845     | 0.046         | H-14->L+1 (10%), H-8->L+2 (12%), H-7->L+2 (27%), H-5->L+2 (22%)     |
| 318.3467792     | 0.0123        | H-14->LUMO (60%), H-13->LUMO (14%)                                  |
| 314.8383358     | 0.1055        | H-3->L+4 (32%)                                                      |
| 312.9864858     | 0.0624        | H-8->L+2 (16%), H-5->L+2 (15%), H-3->L+4 (12%)                      |
| 311.9391552     | 0.0152        | H-7->L+4 (42%)                                                      |
| 310.1211552     | 0.0571        | H-15->LUMO (56%), H-10->L+2 (10%)                                   |
| 308.6004994     | 0.0391        | H-15->LUMO (20%), H-13->L+1 (18%), H-12->L+2 (13%), H-10->L+2 (15%) |
| 307.8189996     | 0.0146        | H-16->LUMO (37%)                                                    |
| 305.5206541     | 0.0151        | H-10->L+4 (16%)                                                     |
| 303.5607978     | 0.0374        | H-8->L+4 (26%), H-5->L+4 (22%)                                      |
| 303.0043908     | 0.04          | H-11->L+1 (30%), H-10->L+4 (15%)                                    |
| 300.6385467     | 0.0368        | H-11->L+1 (16%), H-9->L+2 (38%)                                     |



**Table S8.** The assigned formula of species found in ESI-MS ( $\text{Ag}_{24}$  dissolved in mixture solvent ( $\text{CH}_2\text{Cl}_2$  : DMF = 1 : 2) for one hour; Declustering potential: 40 V; Collision energy: 2 V). Note: [\*] =  $[\text{NH}_2(\text{CH}_3)_2][\text{CF}_3\text{COO}]$ .

| Peak                                          | Formula                                                                                                                       | Cal.    | Exp.    |
|-----------------------------------------------|-------------------------------------------------------------------------------------------------------------------------------|---------|---------|
| 3a<br>( $\text{Ag}_{18}(\mathbf{8e})+10[*]$ ) | $\{[\text{NH}_2(\text{CH}_3)_2]_{10}\text{Ag}_{18}\text{S}(\text{S}'\text{Pr})_5(\text{CF}_3\text{COO})_{12}(\text{DMF})\}^+$ | 4238.93 | 4238.94 |
| 3b<br>( $\text{Ag}_{18}(\mathbf{8e})+11[*]$ ) | $\{[\text{NH}_2(\text{CH}_3)_2]_{11}\text{Ag}_{18}\text{S}(\text{S}'\text{Pr})_5(\text{CF}_3\text{COO})_{13}(\text{DMF})\}^+$ | 4397.98 | 4397.97 |
| 3c<br>( $\text{Ag}_{19}(\mathbf{8e})+10[*]$ ) | $\{[\text{NH}_2(\text{CH}_3)_2]_{10}\text{Ag}_{19}\text{S}(\text{S}'\text{Pr})_5(\text{CF}_3\text{COO})_{13}(\text{DMF})\}^+$ | 4460.82 | 4460.78 |
| 3d<br>( $\text{Ag}_{18}(\mathbf{8e})+12[*]$ ) | $\{[\text{NH}_2(\text{CH}_3)_2]_{12}\text{Ag}_{18}\text{S}(\text{S}'\text{Pr})_5(\text{CF}_3\text{COO})_{14}(\text{DMF})\}^+$ | 4557.03 | 4556.98 |
| 3e<br>( $\text{Ag}_{19}(\mathbf{8e})+11[*]$ ) | $\{[\text{NH}_2(\text{CH}_3)_2]_{11}\text{Ag}_{19}\text{S}(\text{S}'\text{Pr})_5(\text{CF}_3\text{COO})_{14}(\text{DMF})\}^+$ | 4619.87 | 4619.82 |
| 3f<br>( $\text{Ag}_{18}(\mathbf{8e})+13[*]$ ) | $\{[\text{NH}_2(\text{CH}_3)_2]_{13}\text{Ag}_{18}\text{S}(\text{S}'\text{Pr})_5(\text{CF}_3\text{COO})_{15}(\text{DMF})\}^+$ | 4716.08 | 4716.02 |
| 3g<br>( $\text{Ag}_{19}(\mathbf{8e})+12[*]$ ) | $\{[\text{NH}_2(\text{CH}_3)_2]_{12}\text{Ag}_{19}\text{S}(\text{S}'\text{Pr})_5(\text{CF}_3\text{COO})_{15}(\text{DMF})\}^+$ | 4778.92 | 4778.86 |

**Table S9.** The assigned formula of species found in ESI-MS ( $\text{Ag}_{24}$  dissolved in mixture solvent ( $\text{CH}_2\text{Cl}_2$  : DMF = 1 : 2) for three hour; Declustering potential: 40 V; Collision energy: 2 V). Note: [\*] =  $[\text{NH}_2(\text{CH}_3)_2][\text{CF}_3\text{COO}]$ .

| Peak                                          | Formula                                                                                                                  | Cal.    | Exp.    |
|-----------------------------------------------|--------------------------------------------------------------------------------------------------------------------------|---------|---------|
| 4a<br>( $\text{Ag}_{42}(\mathbf{24e})+8[*]$ ) | $\{[\text{NH}_2(\text{CH}_3)_2]_8[\text{Ag}_{42}\text{S}_4(\text{S}'\text{Pr})_{11}(\text{CF}_3\text{COO})_9]\}^{2-}$    | 3435.29 | 3435.30 |
| 4b<br>( $\text{Ag}_{42}(\mathbf{24e})+8[*]$ ) | $\{[\text{NH}_2(\text{CH}_3)_2]_8[\text{Ag}_{42}\text{S}_4(\text{S}'\text{Pr})_{10}(\text{CF}_3\text{COO})_{10}]\}^{2-}$ | 3454.27 | 3454.29 |
| 4c<br>( $\text{Ag}_{43}(\mathbf{24e})+8[*]$ ) | $\{[\text{NH}_2(\text{CH}_3)_2]_8[\text{Ag}_{43}\text{S}_4(\text{S}'\text{Pr})_{11}(\text{CF}_3\text{COO})_{10}]\}^{2-}$ | 3546.24 | 3546.27 |
| 4d<br>( $\text{Ag}_{43}(\mathbf{24e})+8[*]$ ) | $\{[\text{NH}_2(\text{CH}_3)_2]_8[\text{Ag}_{43}\text{S}_4(\text{S}'\text{Pr})_{10}(\text{CF}_3\text{COO})_{11}]\}^{2-}$ | 3565.22 | 3565.24 |
| 4e<br>( $\text{Ag}_{44}(\mathbf{24e})+8[*]$ ) | $\{[\text{NH}_2(\text{CH}_3)_2]_8[\text{Ag}_{44}\text{S}_4(\text{S}'\text{Pr})_{11}(\text{CF}_3\text{COO})_{11}]\}^{2-}$ | 3656.18 | 3656.20 |
| 4f<br>( $\text{Ag}_{44}(\mathbf{24e})+8[*]$ ) | $\{[\text{NH}_2(\text{CH}_3)_2]_8[\text{Ag}_{44}\text{S}_4(\text{S}'\text{Pr})_{10}(\text{CF}_3\text{COO})_{12}]\}^{2-}$ | 3675.16 | 3675.17 |
| 4g<br>( $\text{Ag}_{45}(\mathbf{24e})+8[*]$ ) | $\{[\text{NH}_2(\text{CH}_3)_2]_8[\text{Ag}_{45}\text{S}_4(\text{S}'\text{Pr})_{11}(\text{CF}_3\text{COO})_{12}]\}^{2-}$ | 3767.13 | 3767.14 |
| 4h<br>( $\text{Ag}_{45}(\mathbf{24e})+8[*]$ ) | $\{[\text{NH}_2(\text{CH}_3)_2]_8[\text{Ag}_{45}\text{S}_4(\text{S}'\text{Pr})_{10}(\text{CF}_3\text{COO})_{13}]\}^{2-}$ | 3786.11 | 3786.11 |
| 4i<br>( $\text{Ag}_{46}(\mathbf{24e})+8[*]$ ) | $\{[\text{NH}_2(\text{CH}_3)_2]_8[\text{Ag}_{46}\text{S}_4(\text{S}'\text{Pr})_{11}(\text{CF}_3\text{COO})_{13}]\}^{2-}$ | 3877.07 | 3877.07 |
| 4j<br>( $\text{Ag}_{47}(\mathbf{24e})+8[*]$ ) | $\{[\text{NH}_2(\text{CH}_3)_2]_8[\text{Ag}_{47}\text{S}_4(\text{S}'\text{Pr})_{11}(\text{CF}_3\text{COO})_{14}]\}^{2-}$ | 3988.02 | 3988.02 |

## References

- 1 G. M. Sheldrick, *Acta Cryst. A*, 2008, **64**, 112-122.
- 2 O. V. Dolomanov, L. J. Bourhis, R. J. Gildea, J. A. K. Howard and H. Puschmann, *J. Appl. Crystallogr.*, 2009, **42**, 339-341.
- 3 (a) G. M. Sheldrick, *Acta Cryst. C*, 2015, **71**, 3-8; (b) C. B. Hueschle, G. M. Sheldrick and B. Dittrich, *J. Appl. Crystallogr.*, 2011, **44**, 1281-1284.
- 4 A. Spek, *Acta Cryst. D*, 2009, **65**, 148-155.
- 5 M. J. Frisch, G. W. Trucks, H. B. Schlegel, G. E. Scuseria, M. A. Robb, J. R. Cheeseman, G. Scalmani, V. Barone, G. A. Petersson, H. Nakatsuji, X. Li, M. Caricato, A. V. Marenich, J. Bloino, B. G. Janesko, R. Gomperts, B. Mennucci, H. P. Hratchian, J. V. Ortiz, A. F. Izmaylov, J. L. Sonnenberg, Williams, F. Ding, F. Lipparini, F. Egidi, J. Goings, B. Peng, A. Petrone, T. Henderson, D. Ranasinghe, V. G. Zakrzewski, J. Gao, N. Rega, G. Zheng, W. Liang, M. Hada, M. Ehara, K. Toyota, R. Fukuda, J. Hasegawa, M. Ishida, T. Nakajima, Y. Honda, O. Kitao, H. Nakai, T. Vreven, K. Throssell, J. A. Montgomery Jr., J. E. Peralta, F. Ogliaro, M. J. Bearpark, J. J. Heyd, E. N. Brothers, K. N. Kudin, V. N. Staroverov, T. A. Keith, R. Kobayashi, J. Normand, K. Raghavachari, A. P. Rendell, J. C. Burant, S. S. Iyengar, J. Tomasi, M. Cossi, J. M. Millam, M. Klene, C. Adamo, R. Cammi, J. W. Ochterski, R. L. Martin, K. Morokuma, O. Farkas, J. B. Foresman and D. J. Fox, Wallingford, CT, **2016**.
- 6 J. P. Perdew, K. Burke and M. Ernzerhof, *Phys. Rev. Lett.*, 1996, **77**, 3865-3868.
- 7 (a) B. P. Pritchard, D. Altaraw, B. Didier, T. D. Gibson and T. L. Windus, *J. Chem. Inf. Model.*, 2019, **59**, 4814-4820; (b) K. L. Schuchardt, B. T. Didier, T. Elsethagen, L. Sun, V. Gurumoorthi, J. Chase, J. Li and T. L. Windus, *J. Chem. Inf. Model.*, 2007, **47**, 1045-1052; (c) D. Feller, *J. Comput. Chem.*, 1996, **17**, 1571-1586; (d) F. Weigend and R. Ahlrichs, *Phys. Chem. Chem. Phys.*, 2005, **7**, 3297-3305; (e) D. Andrae, U. Häußermann, M. Dolg, H. Stoll and H. Preuß, *Theoret. Chim. Acta*, 1990, **77**, 123-141.
- 8 T. Lu and F. Chen, *J. Comput. Chem.*, 2012, **33**, 580-592.
- 9 Y. Kikukawa, Y. Kuroda, K. Suzuki, M. Hibino, K. Yamaguchi and N. Mizuno, *Chem. Commun.*, 2013, **49**, 376-378.
- 10 S. Chen, W. H. Fang, L. Zhang and J. Zhang, *Angew. Chem. Int. Ed.*, 2018, **57**, 11252-11256.
- 11 Z.-Y. Wang, M.-Q. Wang, Y.-L. Li, P. Luo, T.-T. Jia, R.-W. Huang, S.-Q. Zang and T. C. W. Mak, *J. Am. Chem. Soc.*, 2018, **140**, 1069-1076.
- 12 Z. Wang, H.-F. Su, M. Kurmoo, C.-H. Tung, D. Sun and L.-S. Zheng, *Nat. Commun.*, 2018, **9**, 2094.
- 13 X.-Q. Liang, Y.-Z. Li, Z. Wang, S.-S. Zhang, Y.-C. Liu, Z.-Z. Cao, L. Feng, Z.-Y. Gao, Q.-W. Xue, C.-H. Tung and D. Sun, *Nat. Commun.*, 2021, **12**, 4966.
- 14 H. Yang, J. Lei, B. Wu, Y. Wang, M. Zhou, A. Xia, L. Zheng and N. Zheng, *Chem. Commun.*, 2013, **49**, 300-302.
- 15 (a) G. Deng, B. K. Teo and N. Zheng, *J. Am. Chem. Soc.*, 2021, **143**, 10214-10220; (b) G. Deng, S. Malola, P. Yuan, X. Liu, B. K. Teo, H. Hakkinen and N. Zheng, *Angew. Chem. Int. Ed.*, 2021, **60**, 12897-12903.
- 16 Q. Sun, H.-H. Nie, H.-F. Su, S.-Y. Yang and B. K. Teo, *Inorg. Chem.*, 2020, **59**, 8836-8845.
- 17 A. K. Das, R. Mekkat, S. Maity, A. S. Nair, S. Bhandary, R. Bhowal, A. Patra, B. Pathak, D. Chopra and S. Mandal, *Inorg. Chem.*, 2021, **60**, 19270-19277.
- 18 Z. Wang, F.-L. Yang, Y. Yang, Q.-Y. Liu and D. Sun, *Chem. Commun.*, 2019, **55**, 10296-10299.
- 19 Z. Wang, Q.-P. Qu, H.-F. Su, P. Huang, R. K. Gupta, Q.-Y. Liu, C.-H. Tung, D. Sun and L.-S. Zheng, *Sci. China Chem.*, 2020, **63**, 16-20.
- 20 K. Yonesato, H. Ito, H. Itakura, D. Yokogawa, T. Kikuchi, N. Mizuno, K. Yamaguchi and K. Suzuki, *J. Am. Chem. Soc.*, 2019, **141**, 19550-19554.
- 21 X.-M. Luo, C.-H. Gong, X.-Y. Dong, L. Zhang and S.-Q. Zang, *Nano Res.*, 2021, **14**, 2309-2313.
- 22 Z. Wang, J.-W. Liu, H.-F. Su, Q.-Q. Zhao, M. Kurmoo, X.-P. Wang, C.-H. Tung, D. Sun and L.-S. Zheng, *J. Am. Chem. Soc.*, 2019, **141**, 17884-17890.
- 23 M.-Y. Gao, K. Wang, Y. Sun, D. Li, B.-Q. Song, Y. H. Andaloussi, M. J. Zaworotko, J. Zhang and L. Zhang, *J. Am. Chem. Soc.*, 2020, **142**, 12784-12790.
- 24 Z. Han, X.-Y. Dong, P. Luo, S. Li, Z.-Y. Wang, S.-Q. Zang and C. W. Mak Thomas, *Sci. Adv.*, 2020, **6**, eaay0107.
